# Supplementary material for: Synthesis of tetraphosphine macrocycles using copper(i) templates
Source: Royal Society of Chemistry journal article supplement (doi:10.1039/c6dt00758a), 2016-01-01
Supplement: c6dt00758a1.pdf [file c6dt00758a1.pdf]

## Synthesis Of Tetraphosphine Macrocycles Using Copper(I) Templates

*Bryan P. Nell, Charles D. Swor, E. Adrian Henle, Lev N. Zakharov, N. Ian Rinehart,  
Aditya Nathan, and David R. Tyler\**

Department of Chemistry and Biochemistry, University of Oregon, Eugene, OR, 97403,  
USA

E-mail: dtyler@uoregon.edu

### Table of Contents

**Table S1.** Mass spectral data for copper macrocyclic complexes **12-17**.

#### **Demetallation of Complex 16.**

**Figure S1.** Possible stereoisomers of phosphine **22** (arc = -C<sub>3</sub>H<sub>6</sub>-, box = -C<sub>4</sub>H<sub>8</sub>-).

**Figure S2.** <sup>31</sup>P{<sup>1</sup>H} NMR spectrum of **3** in CDCl<sub>3</sub>.

**Figure S3.** <sup>31</sup>P{<sup>1</sup>H} NMR spectrum of **4** in CDCl<sub>3</sub>.

**Figure S4.** <sup>31</sup>P NMR spectrum of **4** in CDCl<sub>3</sub>.

**Figure S5.** <sup>31</sup>P{<sup>1</sup>H} NMR spectrum of Cu(MeOPrPE)<sub>2</sub>PF<sub>6</sub> (**7**) in CDCl<sub>3</sub>.

**Figure S6.** <sup>31</sup>P{<sup>1</sup>H} NMR spectrum of Cu(MeOPrPP)<sub>2</sub>PF<sub>6</sub> (**8**) in CDCl<sub>3</sub>.

**Figure S7.** <sup>31</sup>P{<sup>1</sup>H} NMR spectrum of Cu(MPPE)<sub>2</sub>OTf (**9**) in CDCl<sub>3</sub>.

**Figure S8.** <sup>31</sup>P{<sup>1</sup>H} NMR spectrum of Cu(MPPP)<sub>2</sub>OTf (**10**) in CDCl<sub>3</sub>.

**Figure S9.** <sup>31</sup>P{<sup>1</sup>H} NMR spectrum of **11** in CDCl<sub>3</sub>.

**Figure S10.** <sup>31</sup>P{<sup>1</sup>H} NMR spectrum of **12** in CDCl<sub>3</sub>.

**Figure S11.** <sup>31</sup>P{<sup>1</sup>H} NMR spectrum of **14** in CDCl<sub>3</sub>.

**Figure S12.** <sup>31</sup>P{<sup>1</sup>H} NMR spectrum of **15** in CDCl<sub>3</sub>.

**Figure S13.** <sup>31</sup>P{<sup>1</sup>H} NMR spectrum of **16** in CDCl<sub>3</sub>.

**Figure S14.** <sup>31</sup>P{<sup>1</sup>H} NMR spectrum of **15** from **11**.

**Figure S15.** <sup>31</sup>P{<sup>1</sup>H} NMR spectrum of **17**.

**Figure S16.** <sup>31</sup>P{<sup>1</sup>H} NMR spectrum of **18** in CDCl<sub>3</sub>.

**Figure S17.** <sup>31</sup>P{<sup>1</sup>H} NMR spectrum of **19** in CDCl<sub>3</sub>.

**Figure S18.** <sup>31</sup>P{<sup>1</sup>H} NMR spectrum of **20**.

**Figure S19.** <sup>31</sup>P NMR spectrum of **21** in CDCl<sub>3</sub>.

**Figure S20.** <sup>31</sup>P{<sup>1</sup>H} NMR spectrum of **22**.

**Figure S21.** <sup>31</sup>P{<sup>1</sup>H} NMR spectrum of **23**.

**Figure S22.** <sup>31</sup>P{<sup>1</sup>H} NMR spectrum of Co(**23**)Cl<sub>2</sub>.

**Figure S23.** <sup>1</sup>H NMR spectrum of **3**.

**Figure S24.** <sup>1</sup>H NMR spectrum of **4** in CDCl<sub>3</sub>.

**Figure S25.** <sup>1</sup>H NMR spectrum of **20**.

**Figure S26.** <sup>1</sup>H NMR spectrum of **21** in CDCl<sub>3</sub>.

**Figure S27.** <sup>1</sup>H NMR spectrum of **22**.

**Figure S28.** <sup>1</sup>H NMR spectrum of **11** vs. **21** in CDCl<sub>3</sub>.

**Figure S29.**  $^1\text{H}$  NMR spectrum of  $\text{Co}(\mathbf{21})\text{Cl}_2$  for Evans' method.  
**Figure S30.**  $^1\text{H}$  NMR spectrum of **23**.  
**Figure S31.** ESI-MS of  $\text{Cu}(\text{MeOPrPE})_2\text{PF}_6$  (**7**).  
**Figure S32.** ESI-MS of  $\text{Cu}(\text{MeOPrPP})_2\text{OTf}$  (**8**).  
**Figure S33.** ESI-MS of  $\text{Cu}(\text{MPPE})_2\text{PF}_6$  (**9**).  
**Figure S34.** ESI-MS of  $\text{Cu}(\text{MPPP})_2\text{OTf}$  (**10**).  
**Figure S35.** ESI-MS of  $\text{Cu}(\mathbf{4})\text{OTf}$  (**11**).  
**Figure S36.** ESI mass spectrum of **12**.  
**Figure S37.** ESI mass spectrum of **13**.  
**Figure S38.** ESI mass spectrum of **15**.  
**Figure S39.** ESI mass spectrum of **16**.  
**Figure S40.** ESI mass spectrum of **17**.  
**Figure S41.** ESI mass spectrum of **15**.  
**Figure S42.** ESI-MS of **18**.  
**Figure S43.** ESI-MS of **19**.  
**Figure S44.** ESI-MS of  $[\text{Co}(\mathbf{21})]\text{Cl}_2$ .  
**Figure S45.** ESI-MS of  $[\text{Fe}(\mathbf{21})(\text{CH}_3\text{CN})_2](\text{BPh}_4)_2$ .  
**Figure S46.** ESI mass spectrum of  $[\text{Fe}(\mathbf{21})(\text{CH}_3\text{CN})_2](\text{OTf})_2$ .  
**Figure S47.** FAB mass spectrum of **23**.  
**Figure S48.** Hi-Res FAB-MS of **23**.  
**Figure S49.** ESI mass spectrum of  $\text{Co}(\mathbf{23})\text{Cl}_2$ .  
**Figure S50.** UV-Vis spectrum of  $\text{Co}(\mathbf{21})\text{Cl}_2$  in dichloromethane.  
**Figure S51.** UV-Vis spectrum of  $\text{Co}(\mathbf{23})\text{Cl}_2$  in dichloromethane.  
**Figure S52.** Infrared spectrum of  $\text{Cu}(\mathbf{4})\text{OTf}$ , **11**.  
**Figure S53.** Infrared spectrum of  $[\text{Fe}(\mathbf{21})(\text{CH}_3\text{CN})_2](\text{OTf})_2$ .  
**Figure S54.** Infrared spectrum of  $[\text{Fe}(\mathbf{21})(\text{CH}_3\text{CN})_2](\text{OTf})_2$  made in an Ar-filled glovebox.  
**Figure S55.** Infrared spectrum of  $[\text{Fe}(\mathbf{21})(\text{CH}_3\text{CN})_2](\text{OTf})_2$  made in an Ar-filled glovebox, redissolved and bubbled with  $\text{N}_2$ .  
**Figure S56.** Overlay of  $[\text{Fe}(\mathbf{21})(\text{CH}_3\text{CN})_2](\text{OTf})_2$  made in an argon-filled glovebox vs. made in a nitrogen-filled glovebox.  
**Figure S57.** Overlay of  $[\text{Fe}(\mathbf{21})(\text{CH}_3\text{CN})_2](\text{OTf})_2$  made in an argon-filled glovebox vs. made in a nitrogen-filled glovebox (y-axis is absorbance).  
**Figure S58.**  $^{31}\text{P}\{^1\text{H}\}$  NMR spectrum of isopropyl allyl(phenyl)phosphinate in  $\text{CDCl}_3$ .  
**Figure S59.**  $^1\text{H}$  NMR spectrum of isopropyl allyl(phenyl)phosphinate in  $\text{CDCl}_3$ .  
**Figure S60.**  $^{13}\text{C}$  NMR spectrum of isopropyl allyl(phenyl)phosphinate in  $\text{CDCl}_3$ .  
**Tables S2-S7.** X-ray crystallographic data for **15**.

**Table S1.** Mass spectral data for copper macrocyclic complexes **12-17**.

| complex   | R                                                 | n | m | Formula                                                                         | $m/z^a$ |
|-----------|---------------------------------------------------|---|---|---------------------------------------------------------------------------------|---------|
| <b>12</b> | CH <sub>3</sub> O(C <sub>3</sub> H <sub>6</sub> ) | 1 | 1 | [C <sub>26</sub> H <sub>56</sub> O <sub>4</sub> P <sub>4</sub> Cu] <sup>+</sup> | 619     |
| <b>13</b> | CH <sub>3</sub> O(C <sub>3</sub> H <sub>6</sub> ) | 2 | 1 | [C <sub>28</sub> H <sub>60</sub> O <sub>4</sub> P <sub>4</sub> Cu] <sup>+</sup> | 647     |
| <b>14</b> | Ph                                                | 1 | 1 | [C <sub>34</sub> H <sub>40</sub> P <sub>4</sub> Cu] <sup>+</sup>                | 635     |
| <b>15</b> | Ph                                                | 2 | 1 | [C <sub>36</sub> H <sub>44</sub> P <sub>4</sub> Cu] <sup>+</sup>                | 663     |
| <b>16</b> | Ph                                                | 1 | 2 | [C <sub>36</sub> H <sub>44</sub> P <sub>4</sub> Cu] <sup>+</sup>                | 663     |
| <b>17</b> | Ph                                                | 2 | 2 | [C <sub>38</sub> H <sub>48</sub> P <sub>4</sub> Cu] <sup>+</sup>                | 691     |

<sup>a</sup>calculated and observed

**Demetallation of Complex 16.** Complex **16** was demetallated with KCN to give the free phosphine **23** as an oily, colorless residue (Scheme 13). The uncoordinated macrocycle ligand displayed a singlet in the <sup>31</sup>P{<sup>1</sup>H} NMR spectra at -20.4 ppm. The general features of the <sup>1</sup>H NMR spectrum are broad and do not give much structural information, but the disappearance of the P-H protons support the idea that full alkylation was achieved. A FAB mass spectrum of **19** showed the expected molecular ion peak plus a proton at 601  $m/z$ , and high resolution mass spectrometry (HR-MS) gave a molecular formula of C<sub>36</sub>H<sub>45</sub>P<sub>4</sub>, which corresponds to [m+H]<sup>+</sup>.

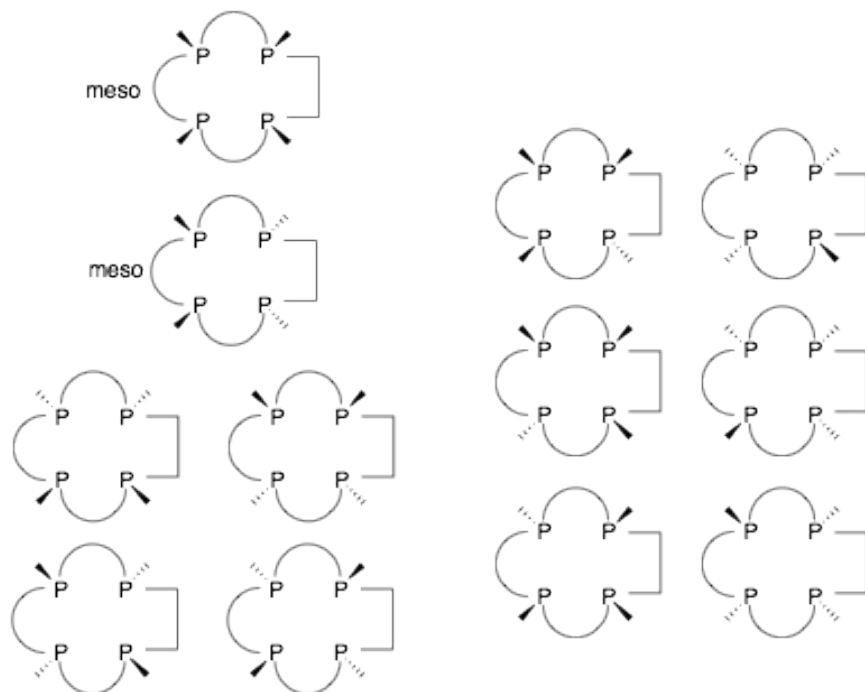

**Figure S1.** Possible stereoisomers of phosphine **21** (arc =  $-C_3H_6-$ , box =  $-C_4H_8-$ ).

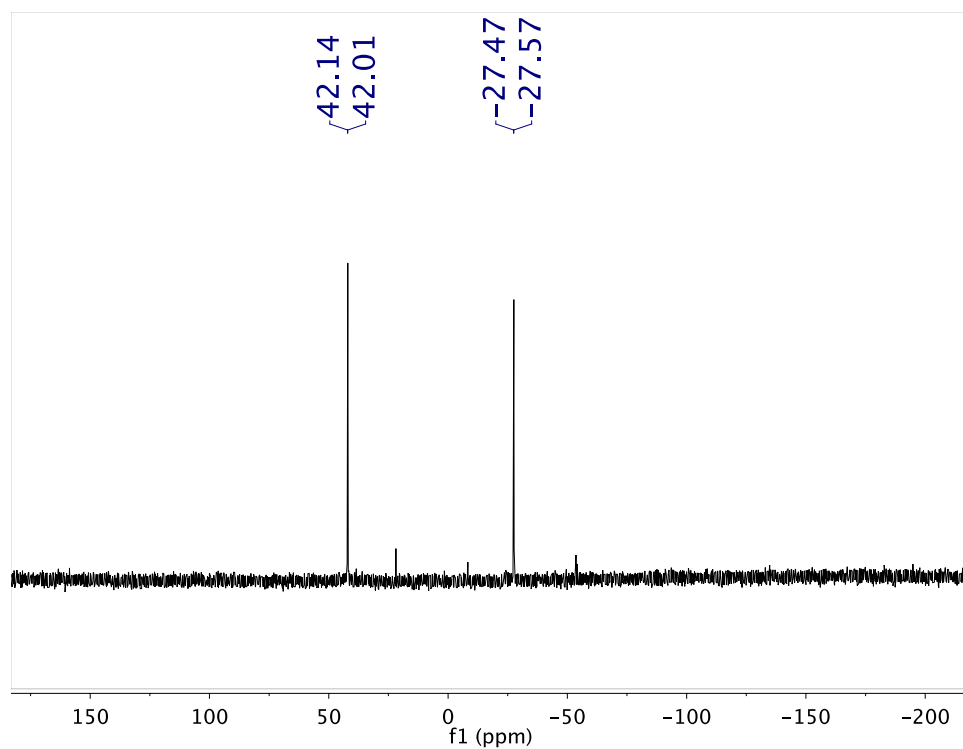

**Figure S2.**  $^{31}P\{^1H\}$  NMR spectrum of **3** in  $CDCl_3$ .

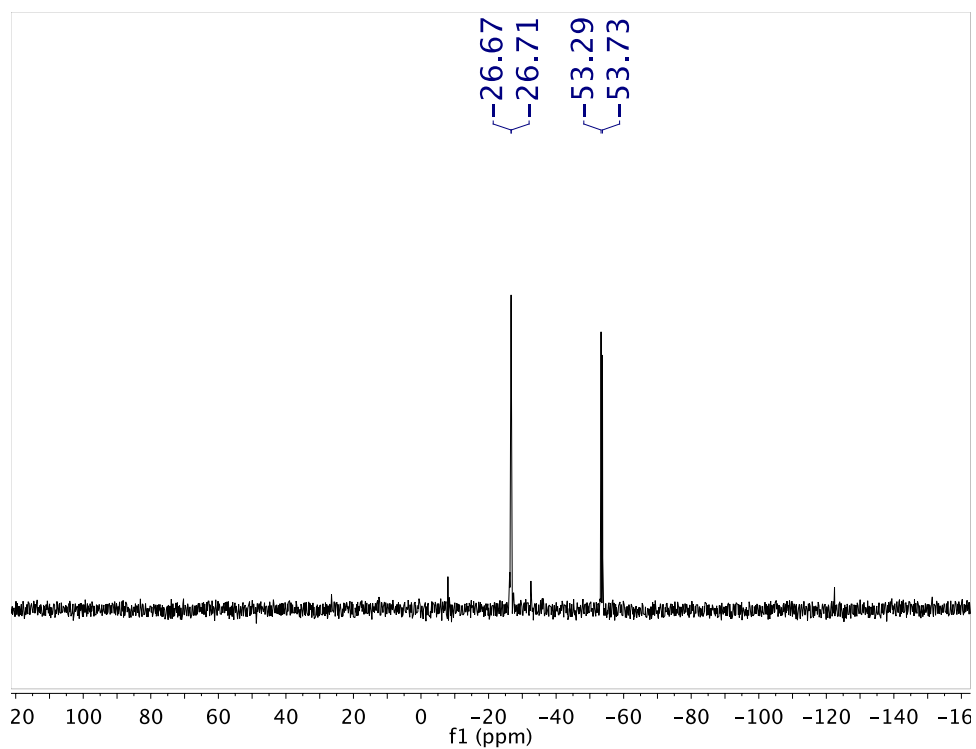

**Figure S3.**  $^{31}\text{P}\{^1\text{H}\}$  NMR spectrum of **4** in  $\text{CDCl}_3$ .

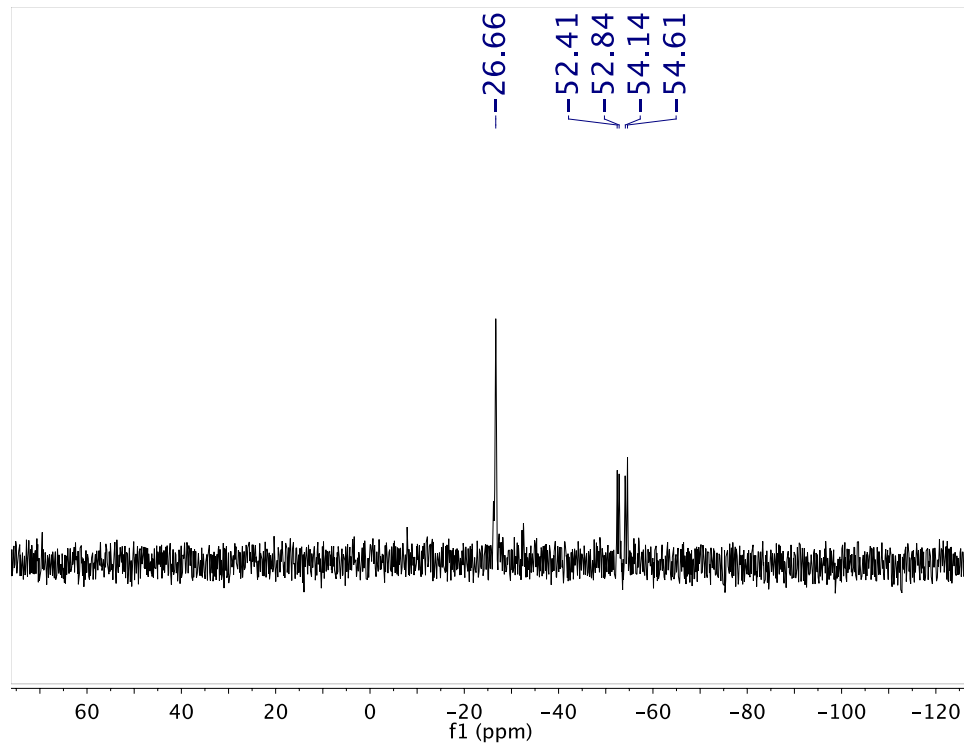

**Figure S4.**  $^{31}\text{P}$  NMR spectrum of **4** in  $\text{CDCl}_3$ .

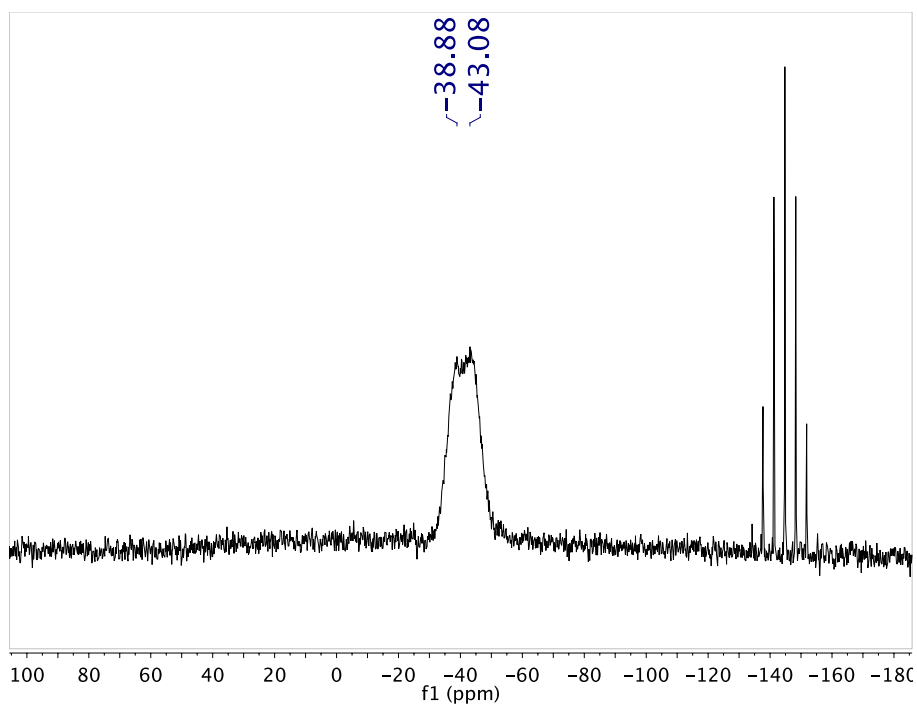

**Figure S5.**  $^{31}\text{P}\{^1\text{H}\}$  NMR spectrum of  $\text{Cu}(\text{MeOPrPE})_2\text{PF}_6$  (**7**) in  $\text{CDCl}_3$ .

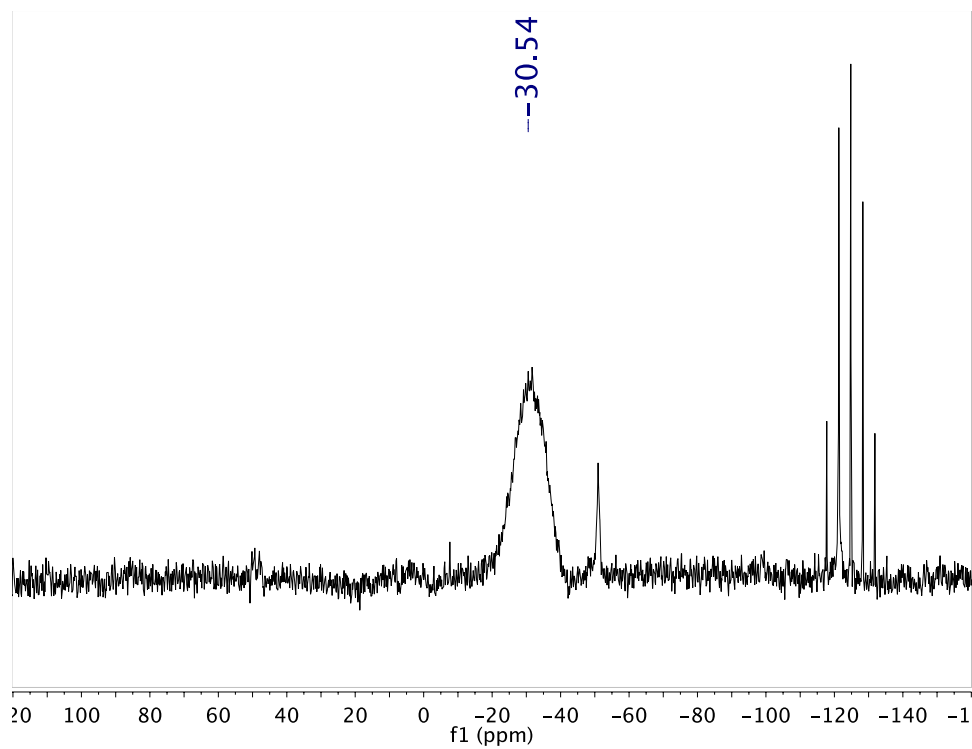

**Figure S6.**  $^{31}\text{P}\{^1\text{H}\}$  NMR spectrum of  $\text{Cu}(\text{MeOPrPP})_2\text{PF}_6$  (**8**) in  $\text{CDCl}_3$ . Note this spectrum is for the  $\text{PF}_6^-$  salt. The  $\text{PF}_6^-$  resonance is at approximately -125 ppm.

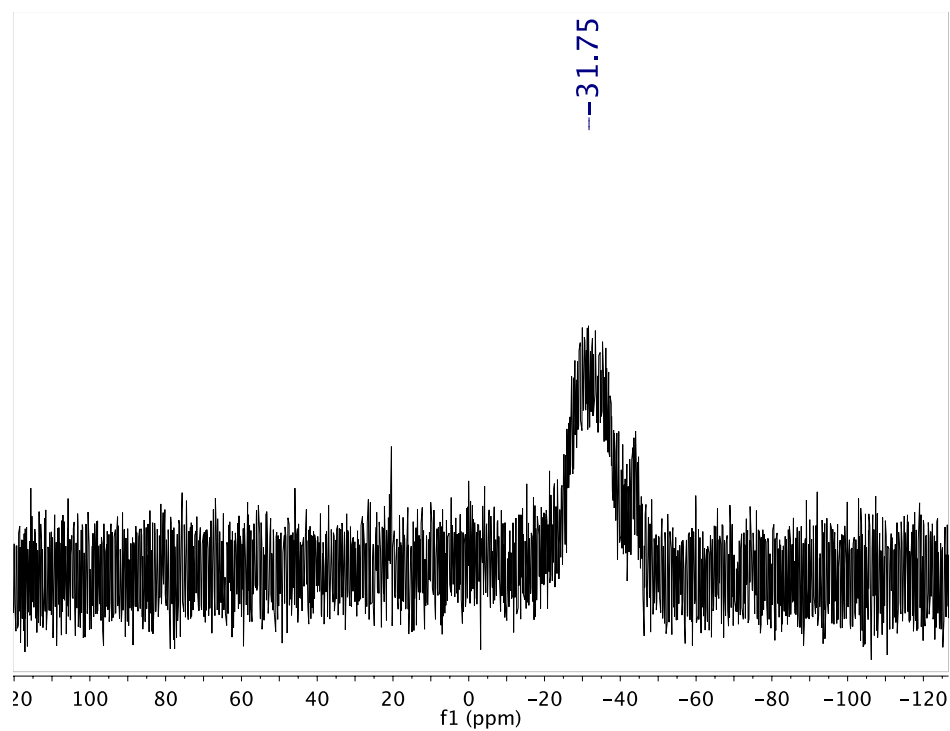

**Figure S7.**  $^{31}\text{P}\{^1\text{H}\}$  NMR spectrum of  $\text{Cu}(\text{MPPE})_2\text{OTf}$  (**9**) in  $\text{CDCl}_3$ .

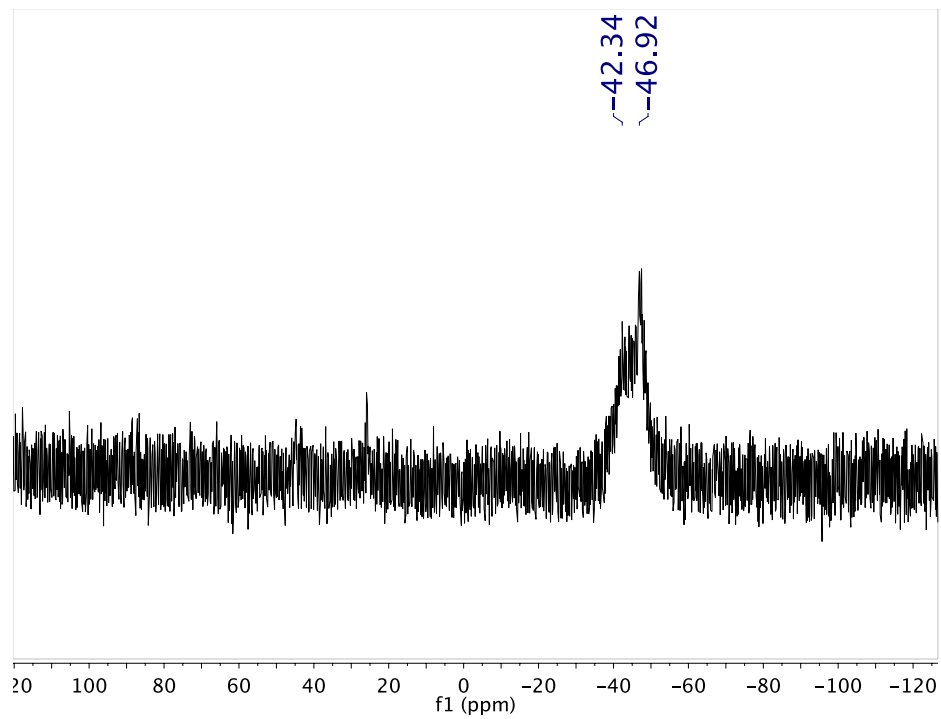

**Figure S8.**  $^{31}\text{P}\{^1\text{H}\}$  NMR spectrum of  $\text{Cu}(\text{MPPP})_2\text{OTf}$  (**10**) in  $\text{CDCl}_3$ .

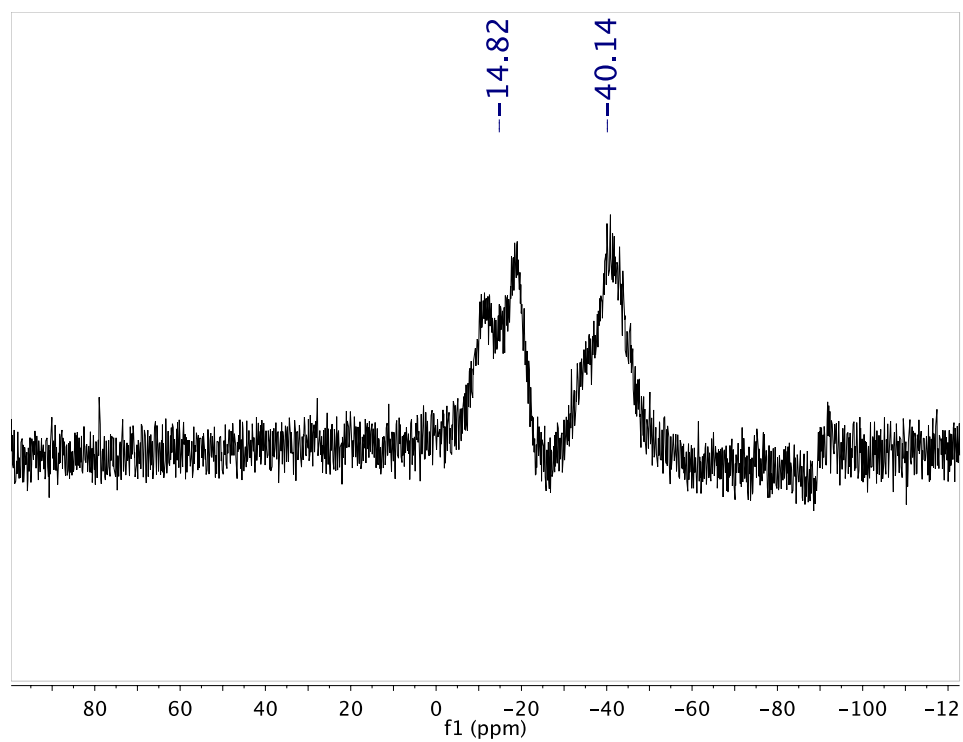

**Figure S9.**  $^{31}\text{P}\{^1\text{H}\}$  NMR spectrum of **11** in  $\text{CDCl}_3$ .

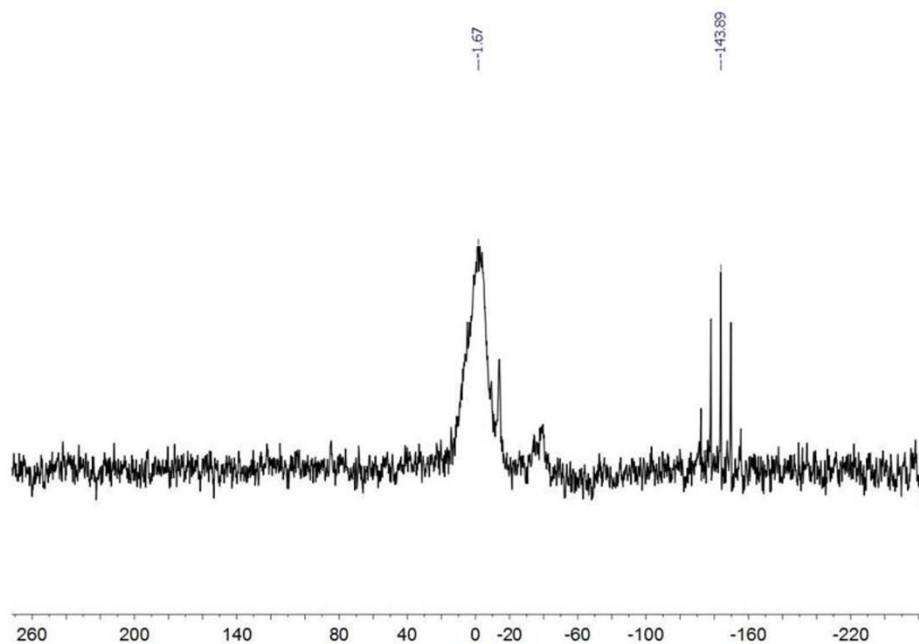

**Figure S10.**  $^{31}\text{P}\{^1\text{H}\}$  NMR spectrum of **12** in  $\text{CDCl}_3$ .

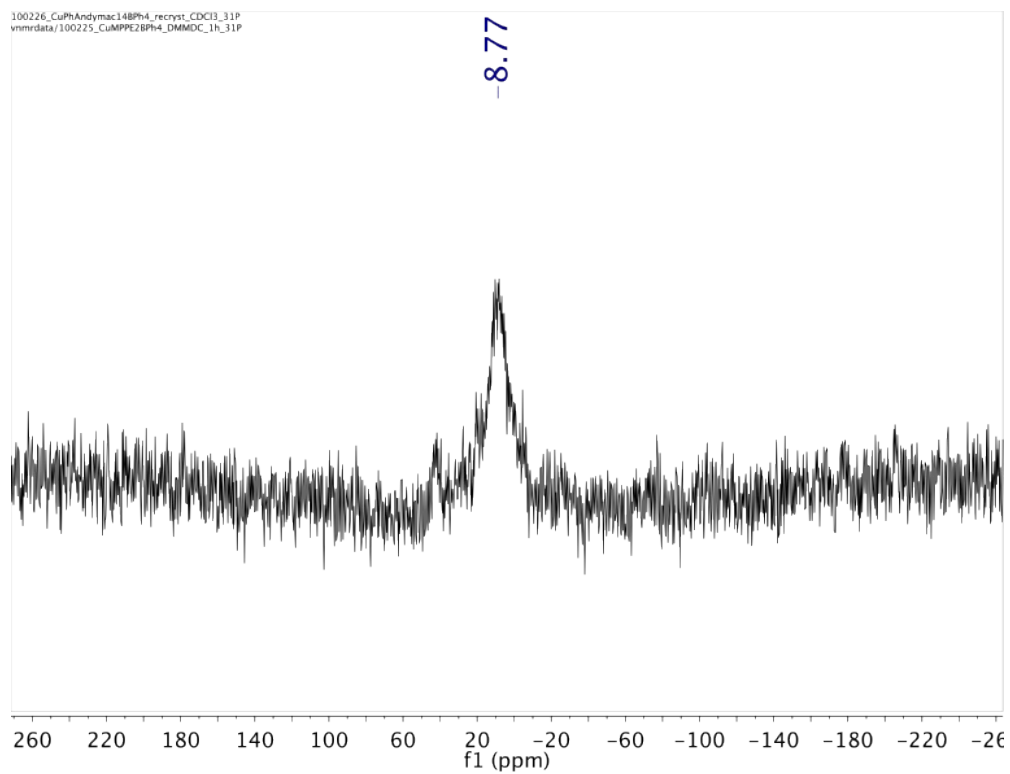



**Figure S11.**  $^{31}\text{P}\{^1\text{H}\}$  NMR spectrum of **14** in  $\text{CDCl}_3$ .

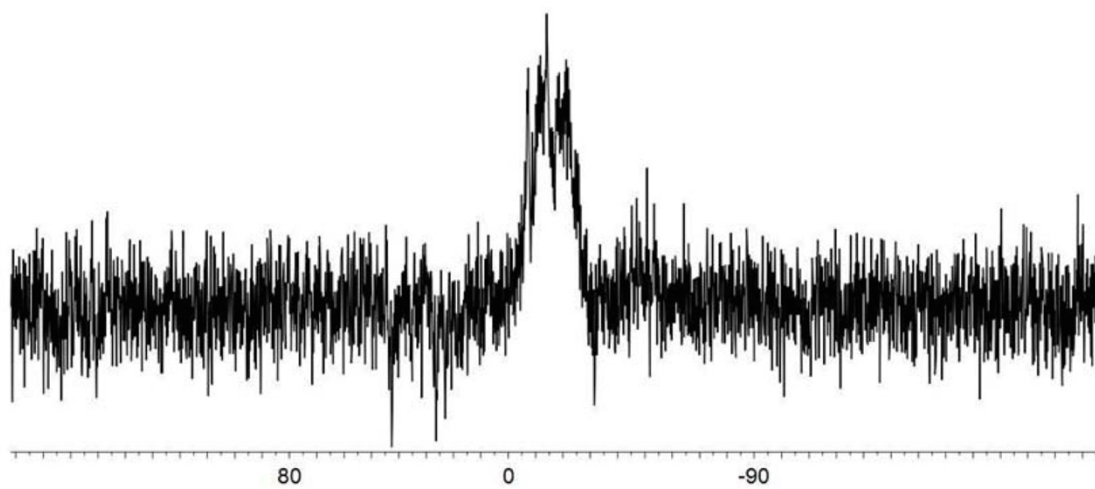

**Figure S12.**  $^{31}\text{P}\{^1\text{H}\}$  NMR spectrum of **15** in  $\text{CDCl}_3$ .

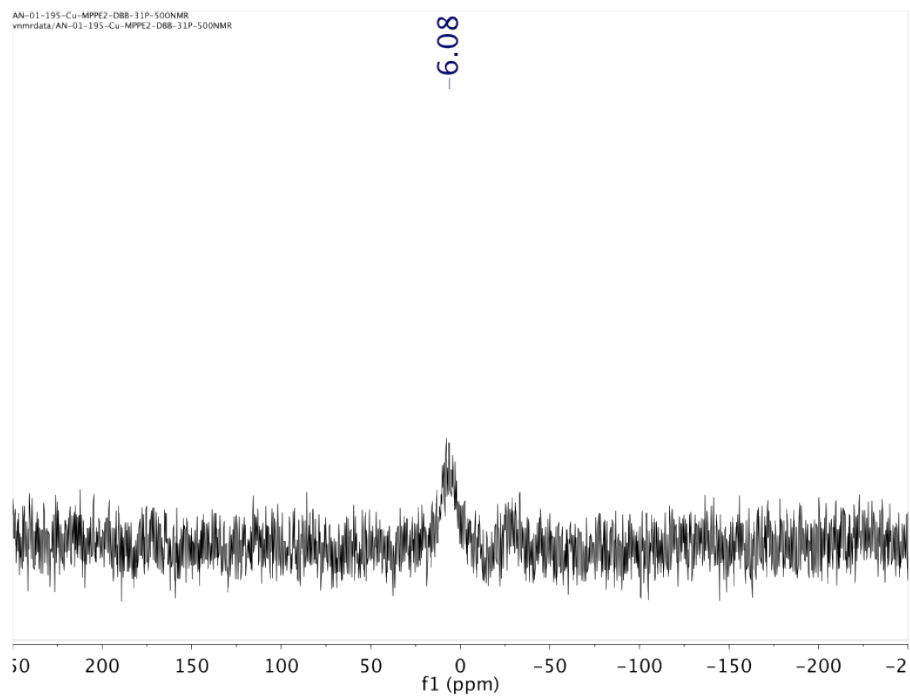

**Figure S13.**  $^{31}\text{P}\{^1\text{H}\}$  NMR spectrum of **16** in  $\text{CDCl}_3$ .

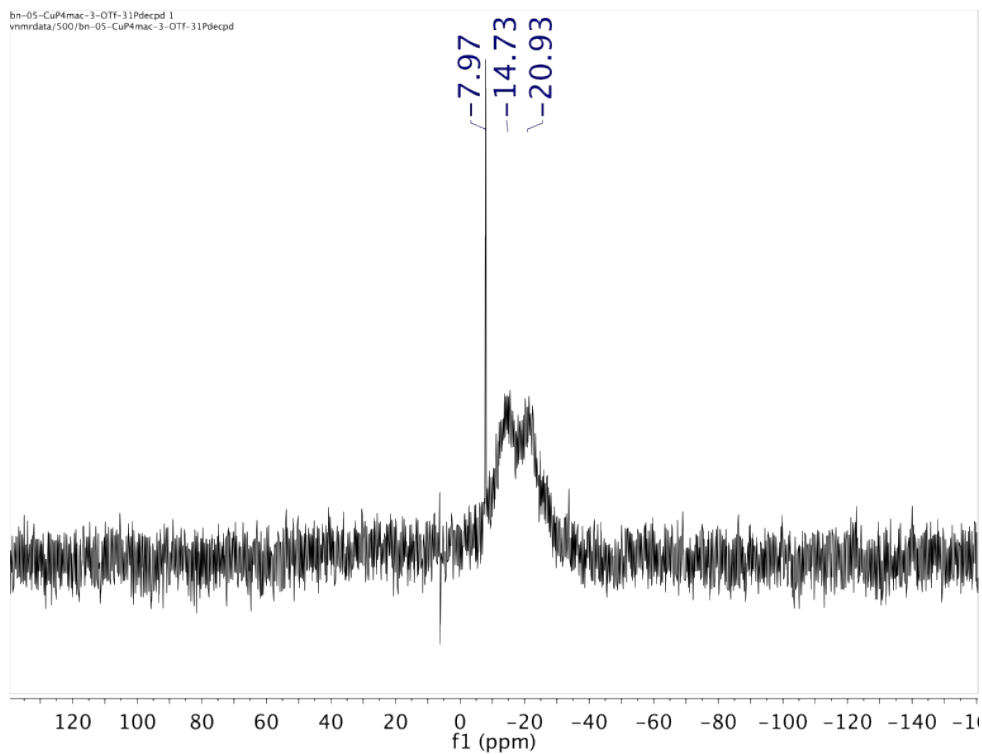

**Figure S14.**  $^{31}\text{P}\{^1\text{H}\}$  NMR spectrum of **15** from **11**.

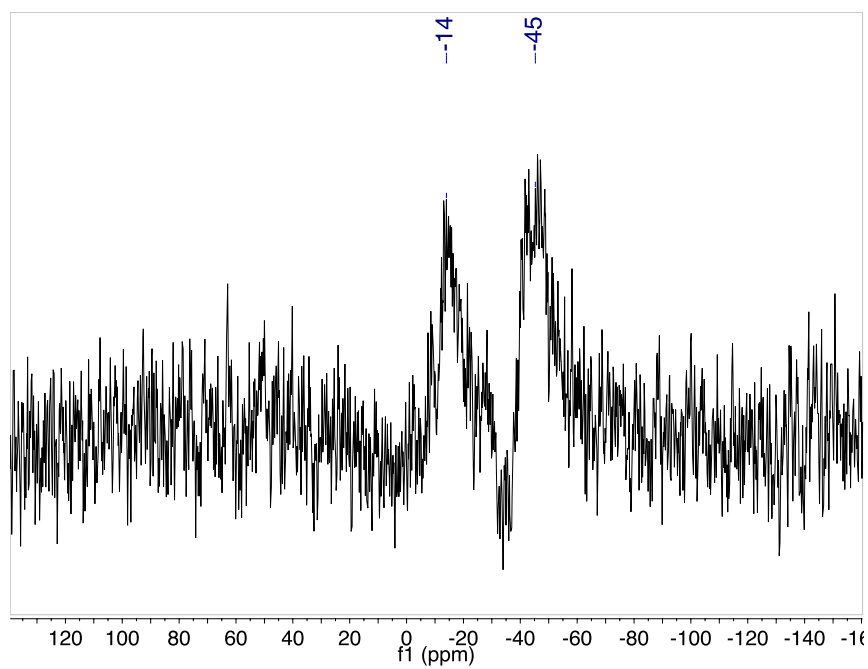

**Figure S15.**  $^{31}\text{P}\{^1\text{H}\}$  NMR spectrum of **17**.

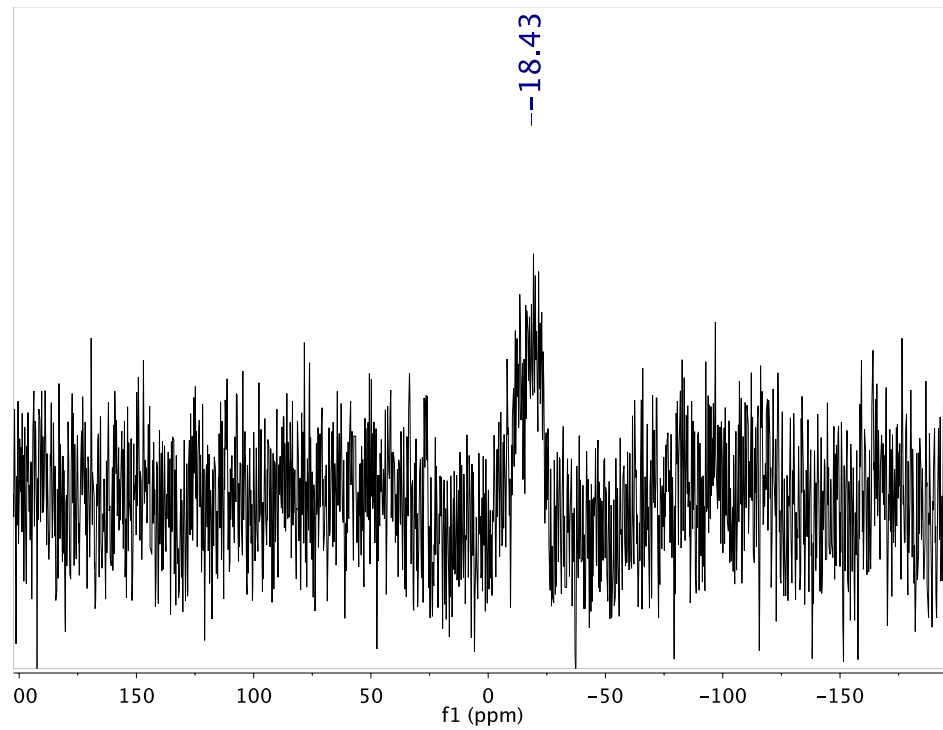

**Figure S16.**  $^{31}\text{P}\{^1\text{H}\}$  NMR spectrum of **18** in  $\text{CDCl}_3$ .

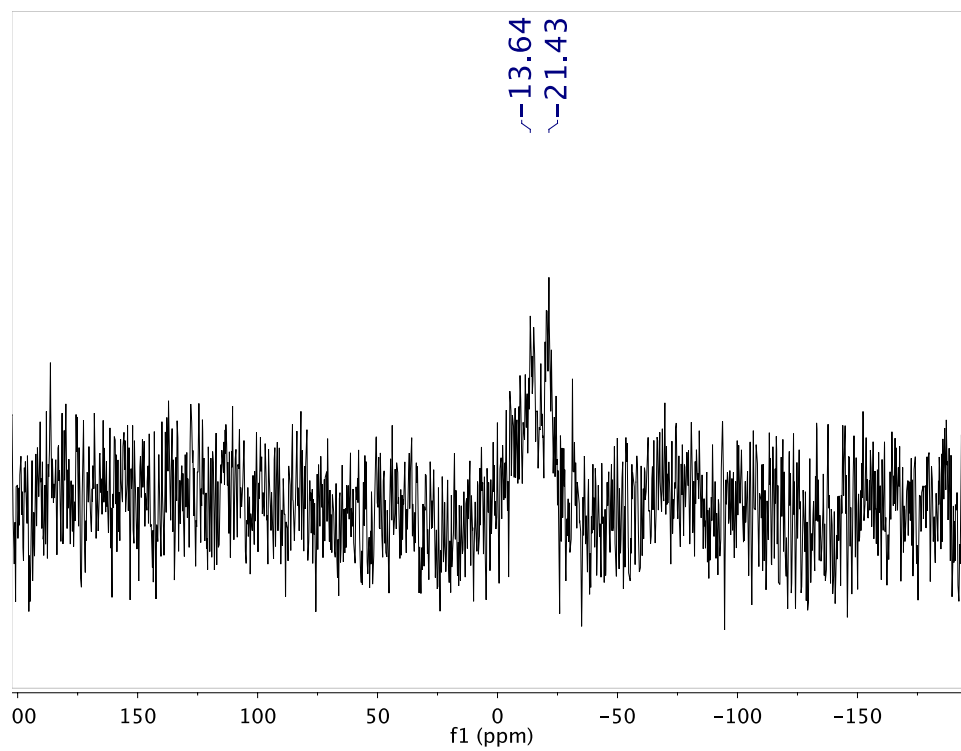

**Figure S17.**  $^{31}\text{P}\{^1\text{H}\}$  NMR spectrum of **19** in  $\text{CDCl}_3$ .

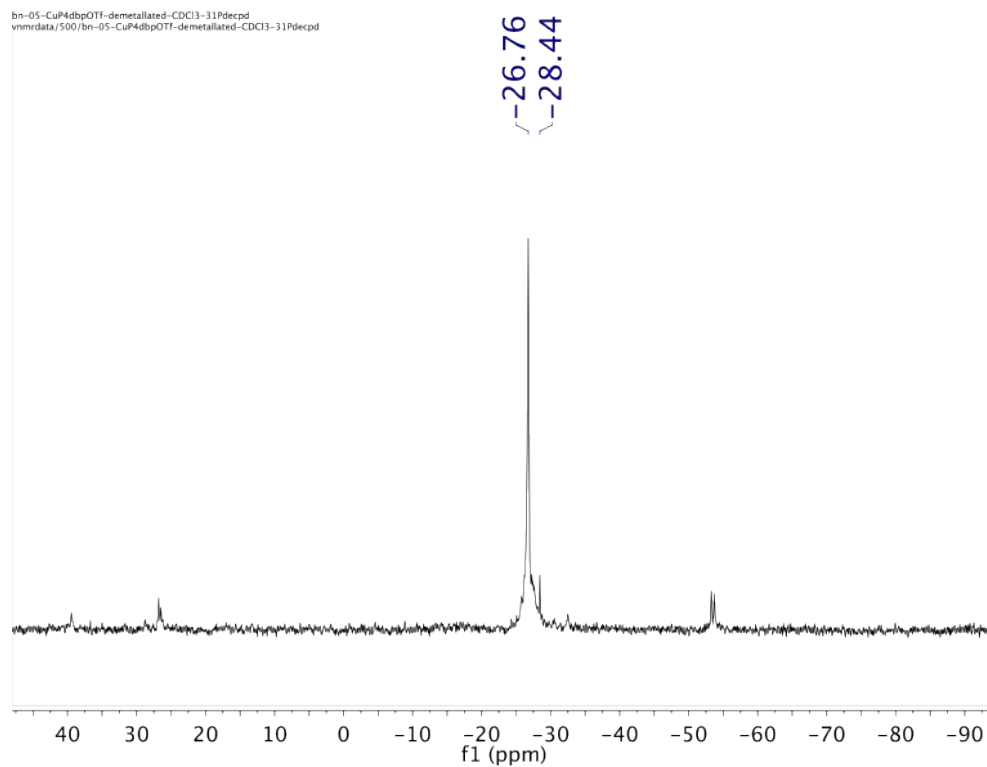

**Figure S18.**  $^{31}\text{P}\{^1\text{H}\}$  NMR spectrum of **20**.

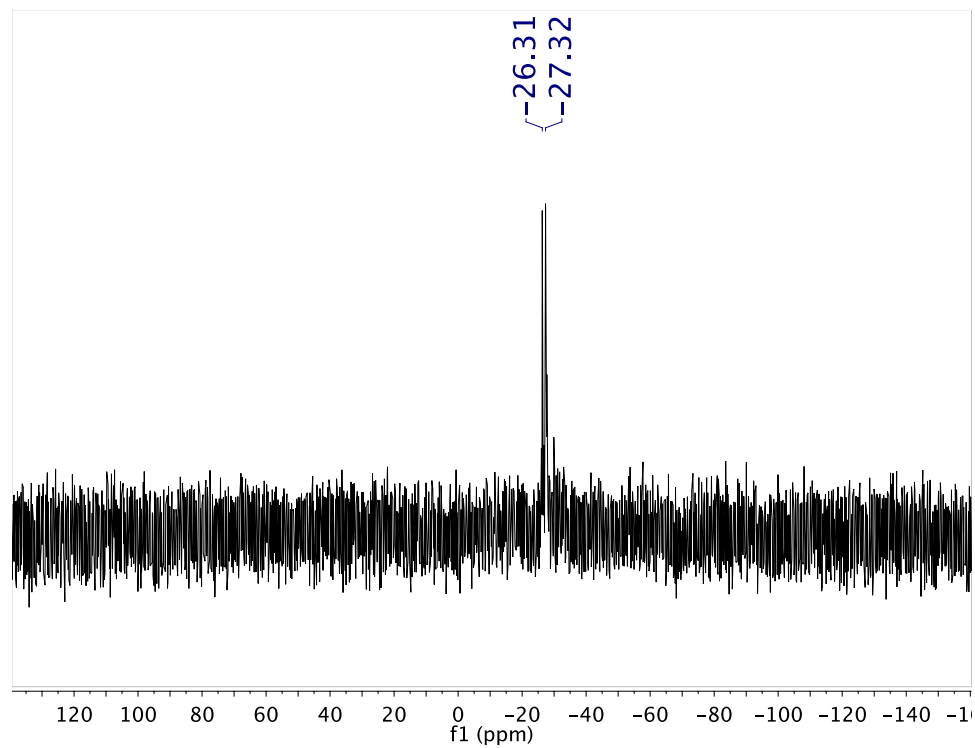

**Figure S19.**  $^{31}\text{P}$  NMR spectrum of **21** in  $\text{CDCl}_3$ .

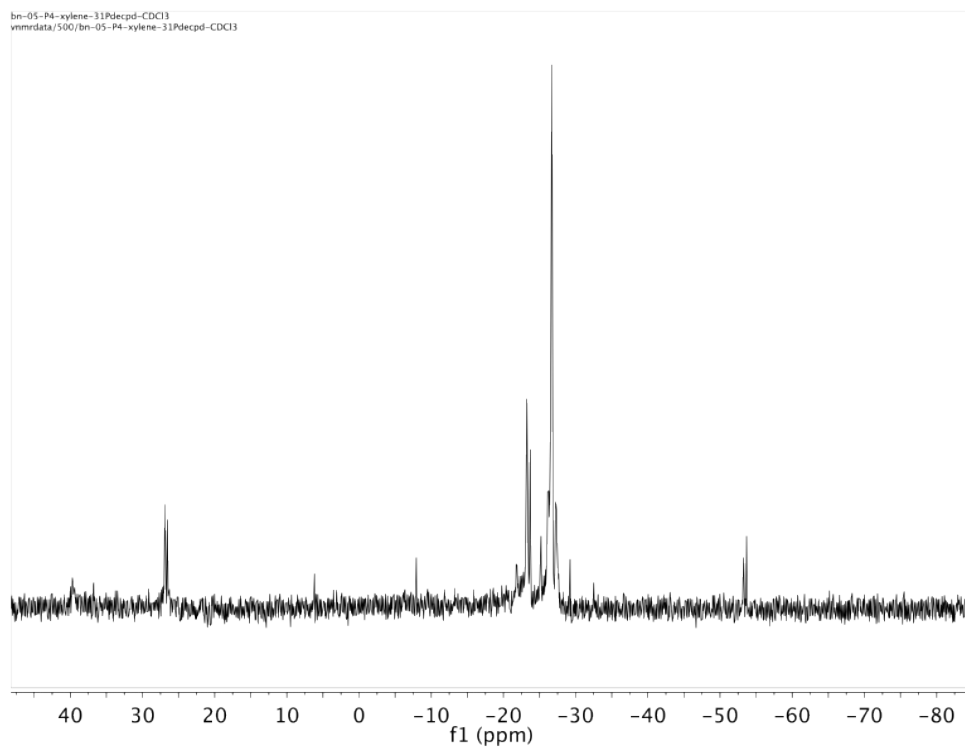

**Figure S20.**  $^{31}\text{P}\{^1\text{H}\}$  NMR spectrum of **22**.

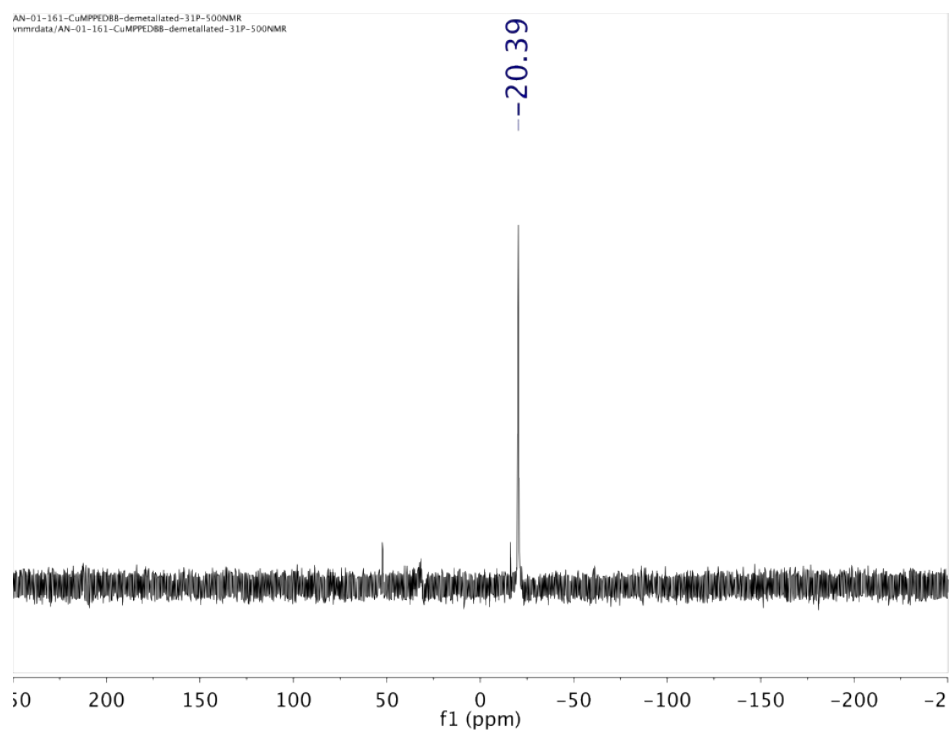

**Figure S21.**  $^{31}\text{P}\{^1\text{H}\}$  NMR spectrum of **23**.

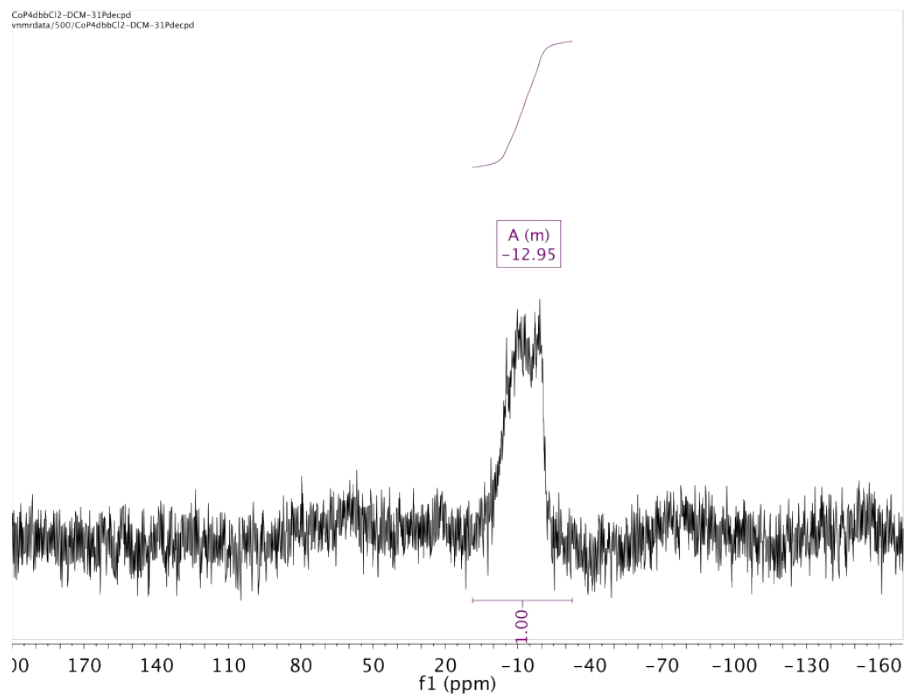

**Figure S22.**  $^{31}\text{P}\{^1\text{H}\}$  NMR spectrum of  $\text{Co}(\mathbf{23})\text{Cl}_2$ .

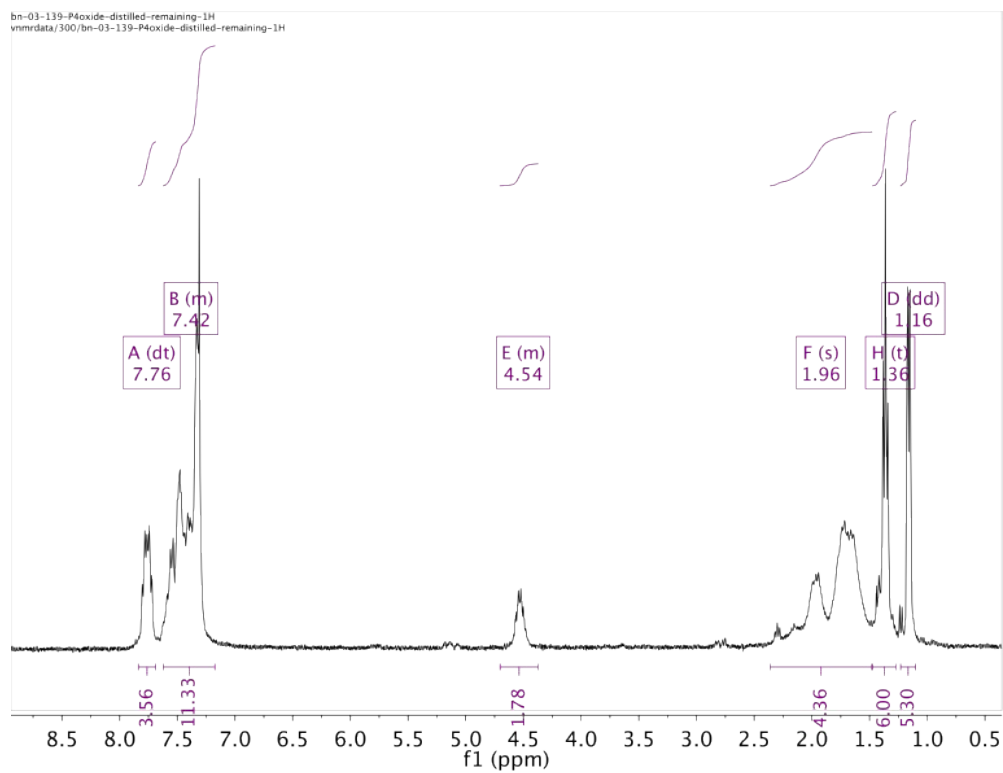

**Figure S23.**  $^1\text{H}$  NMR spectrum of **3**.

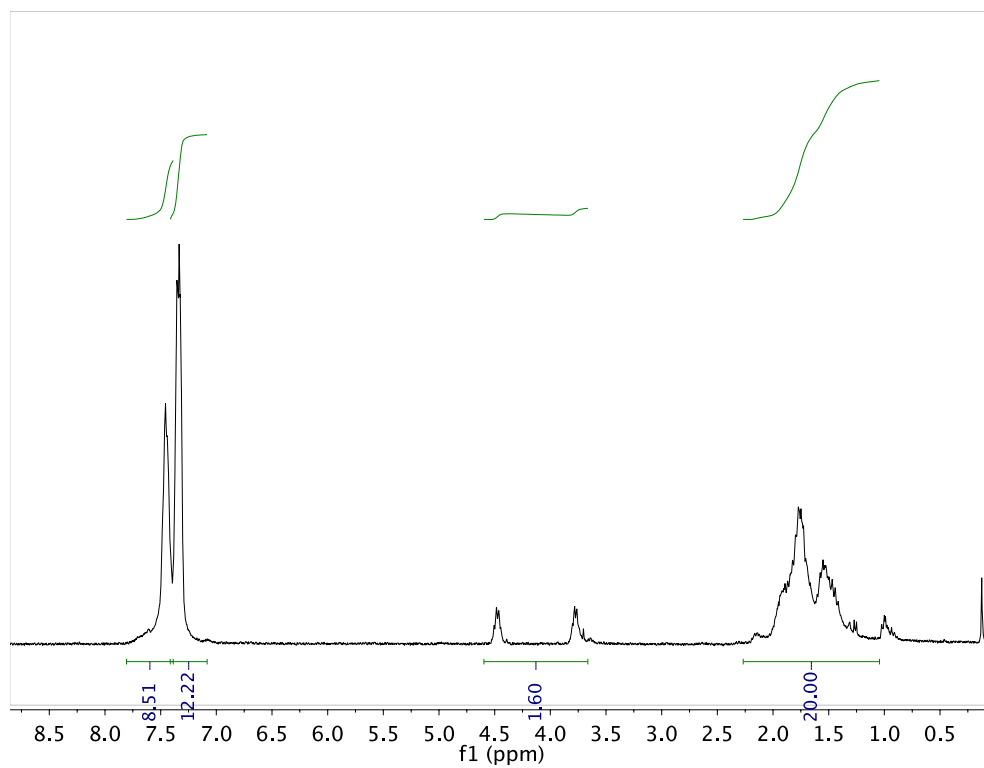

**Figure S24.**  $^1\text{H}$  NMR spectrum of **4** in  $\text{CDCl}_3$ .

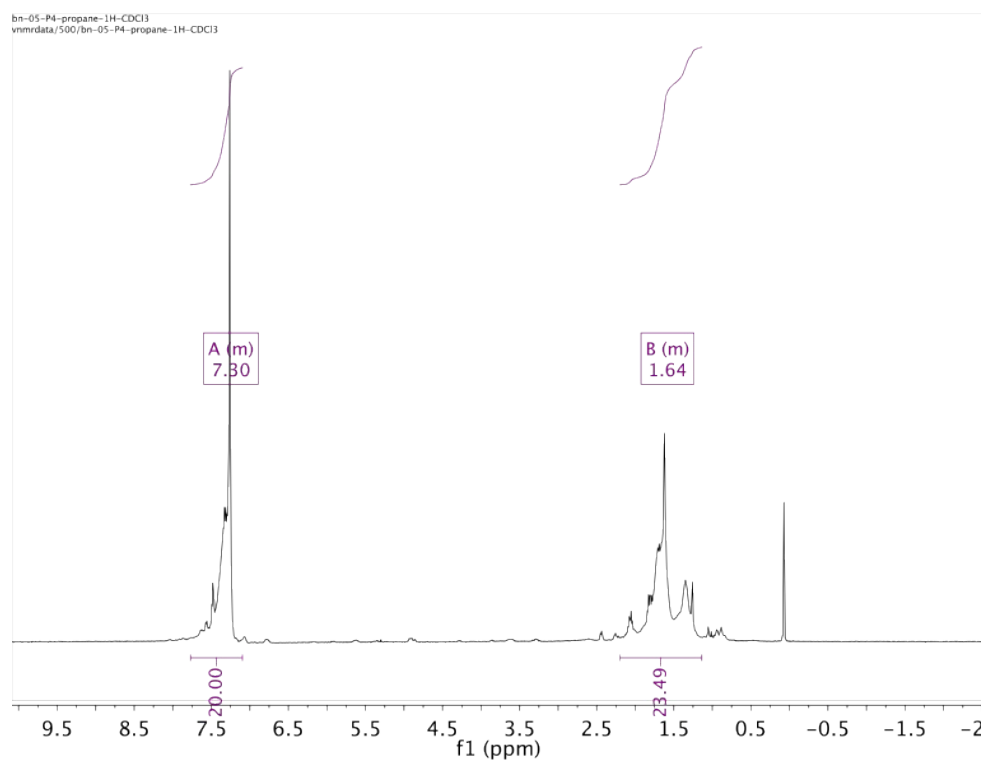

**Figure S25.**  $^1\text{H}$  NMR spectrum of **20**.

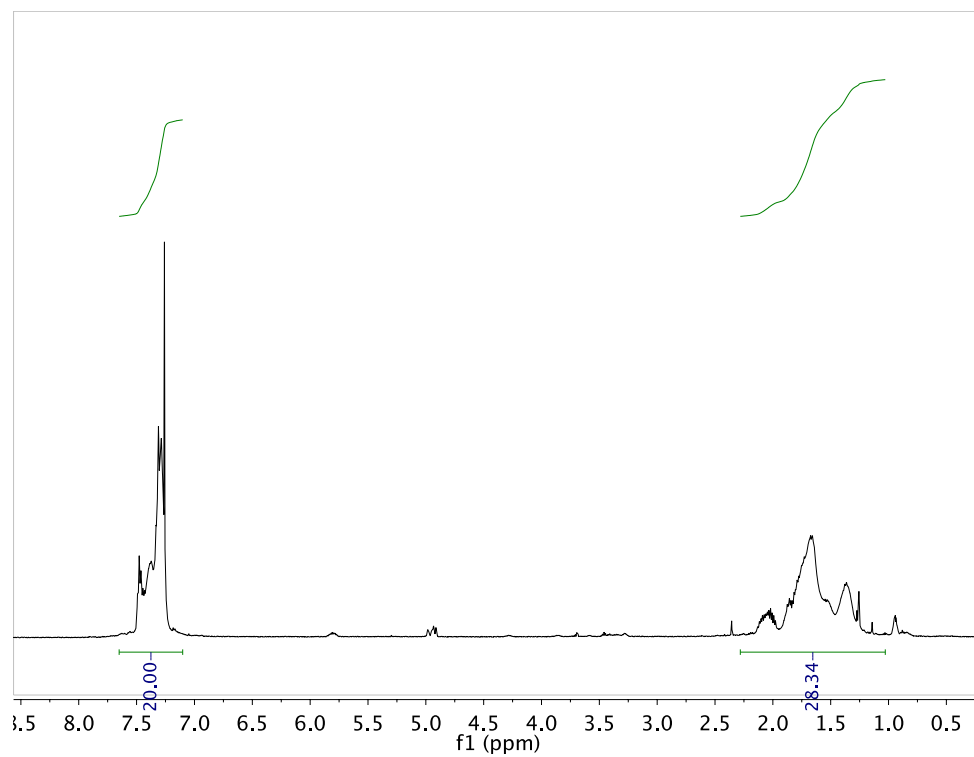

**Figure S26.**  $^1\text{H}$  NMR spectrum of **21** in  $\text{CDCl}_3$ .

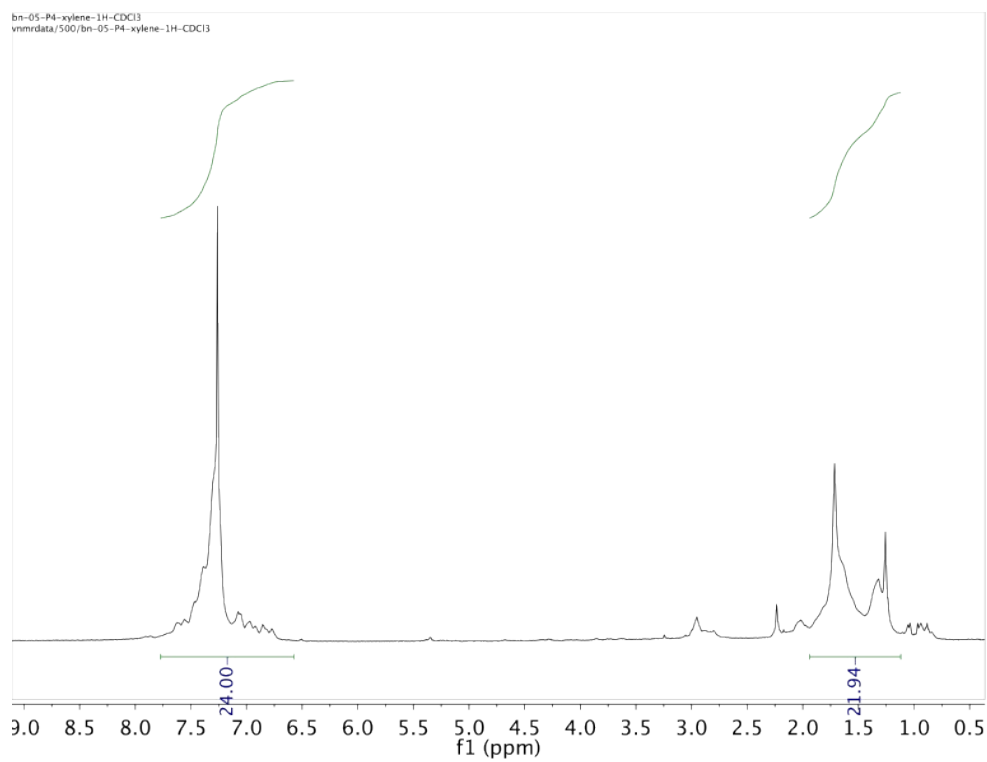

**Figure S27.**  $^1\text{H}$  NMR spectrum of **22**.



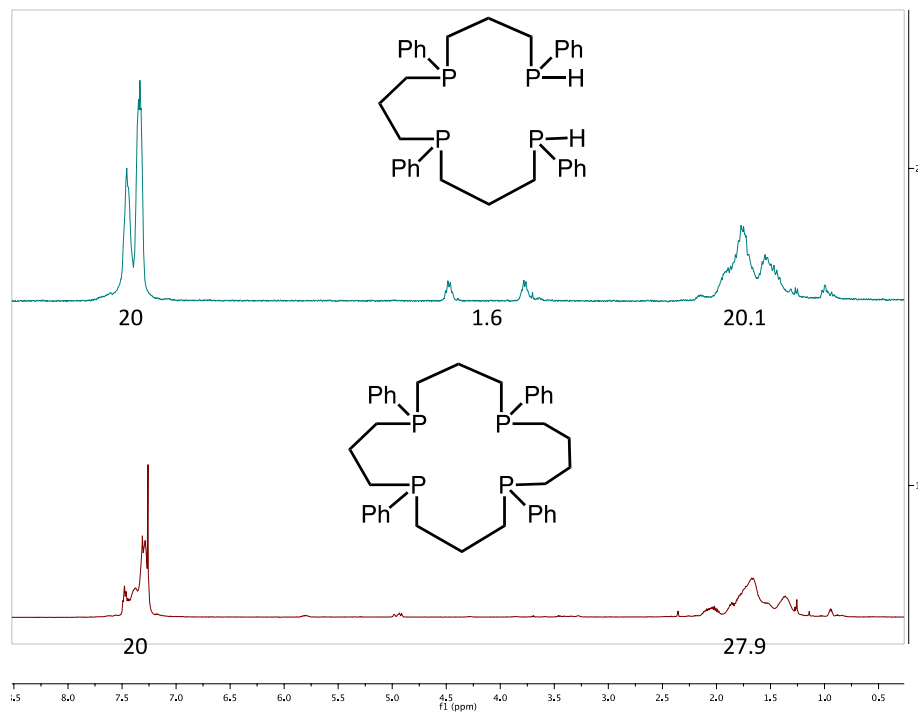

**Figure S28.**  $^1\text{H}$  NMR spectrum of **11** vs. **21** in  $\text{CDCl}_3$ .

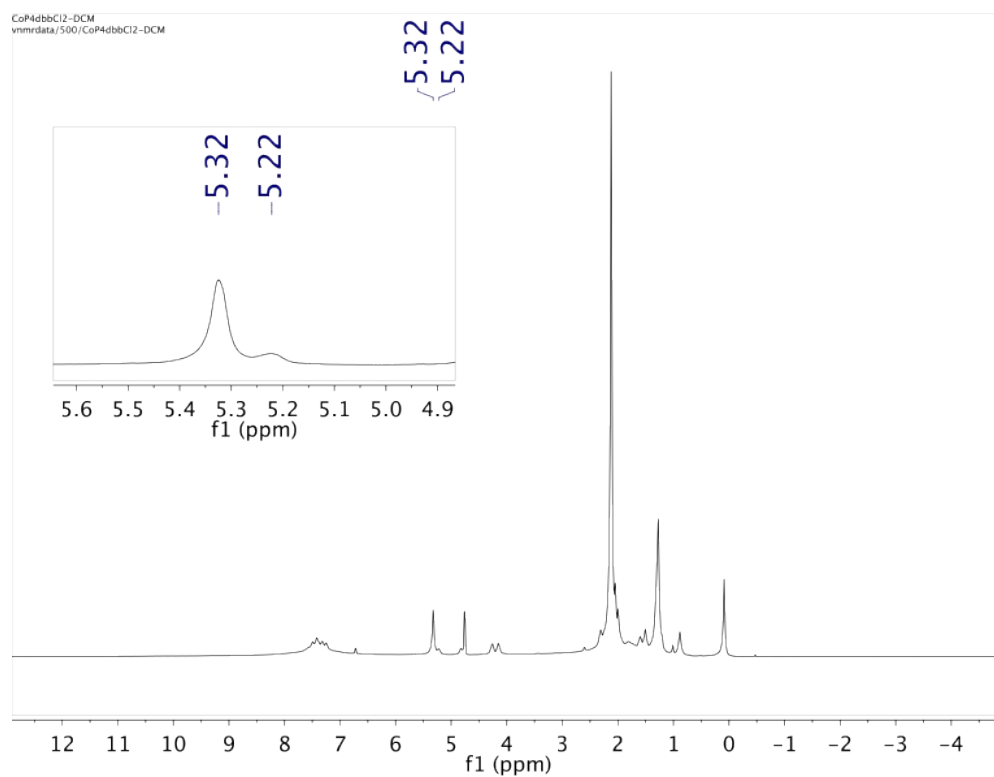

**Figure S29.**  $^1\text{H}$  NMR spectrum of  $\text{Co}(\mathbf{21})\text{Cl}_2$  for Evans' method.

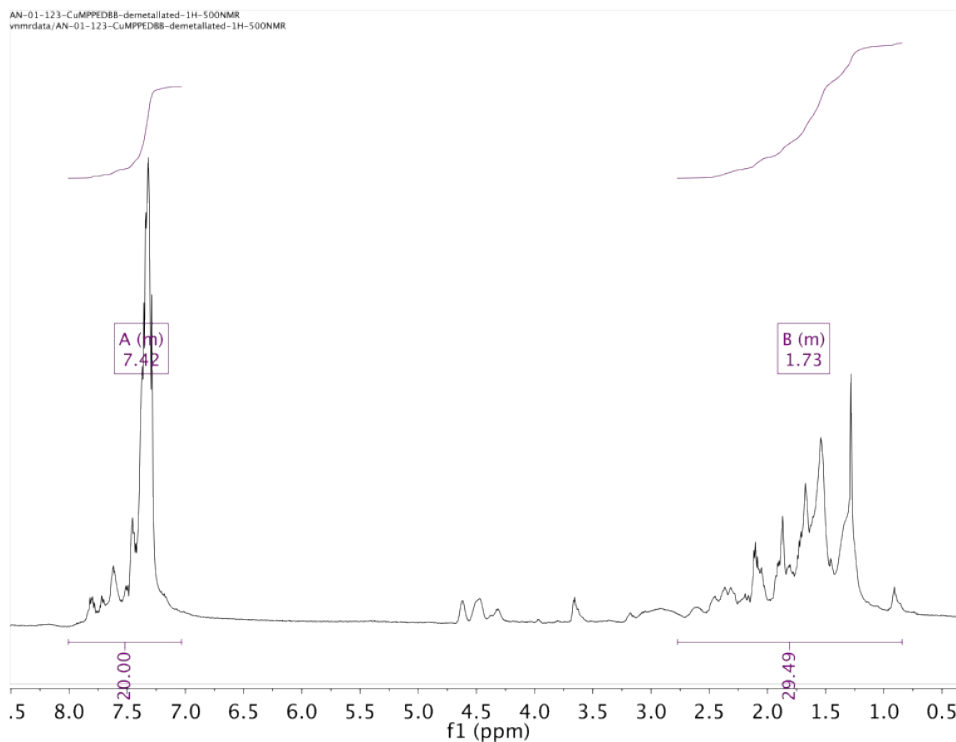

**Figure S30.**  $^1\text{H}$  NMR spectrum of **23**.

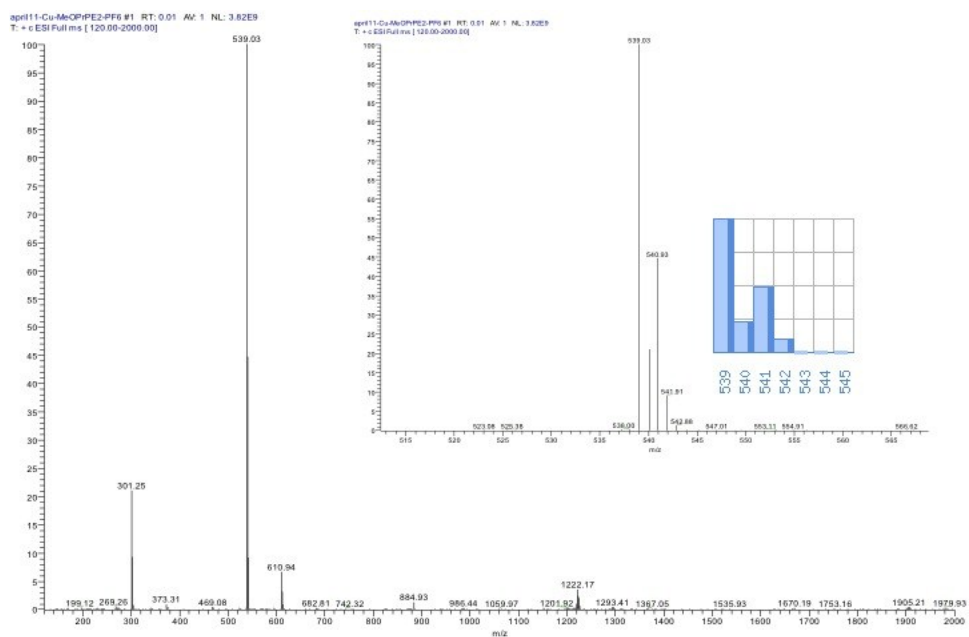

**Figure S31.** ESI-MS of  $\text{Cu}(\text{MeOPrPE})_2\text{PF}_6$  (**7**).

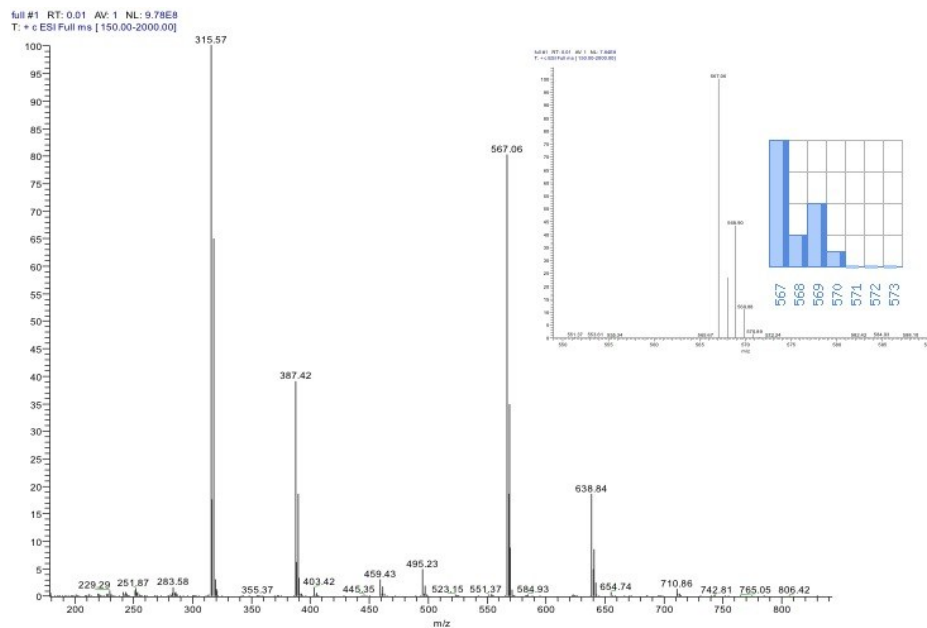

Figure S32. ESI-MS of  $\text{Cu}(\text{MeOPrPP})_2\text{OTf}$  (8).

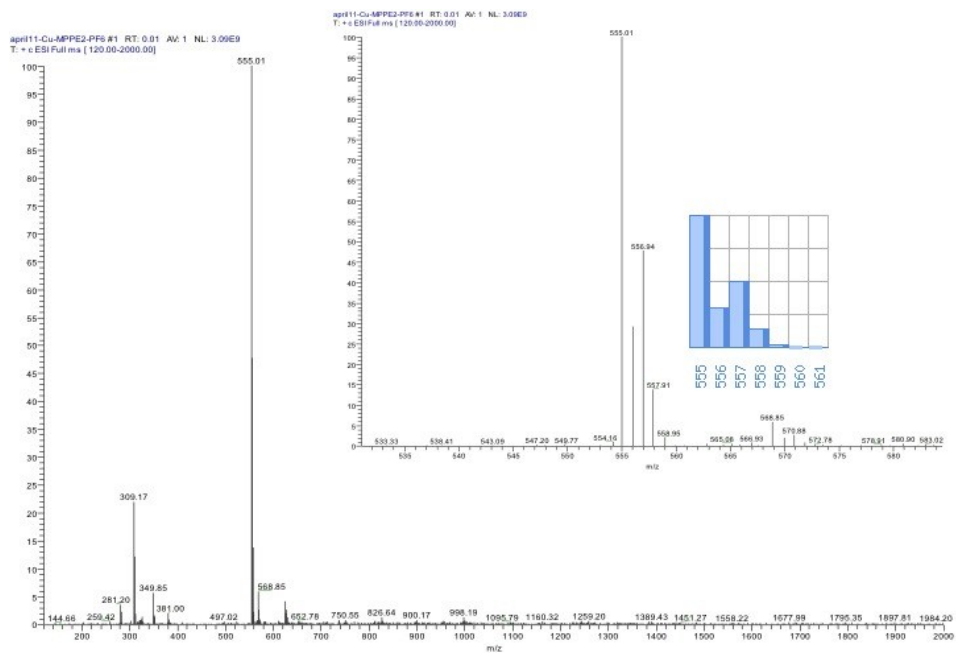

Figure S33. ESI-MS of  $\text{Cu}(\text{MPPE})_2\text{PF}_6$  (9).

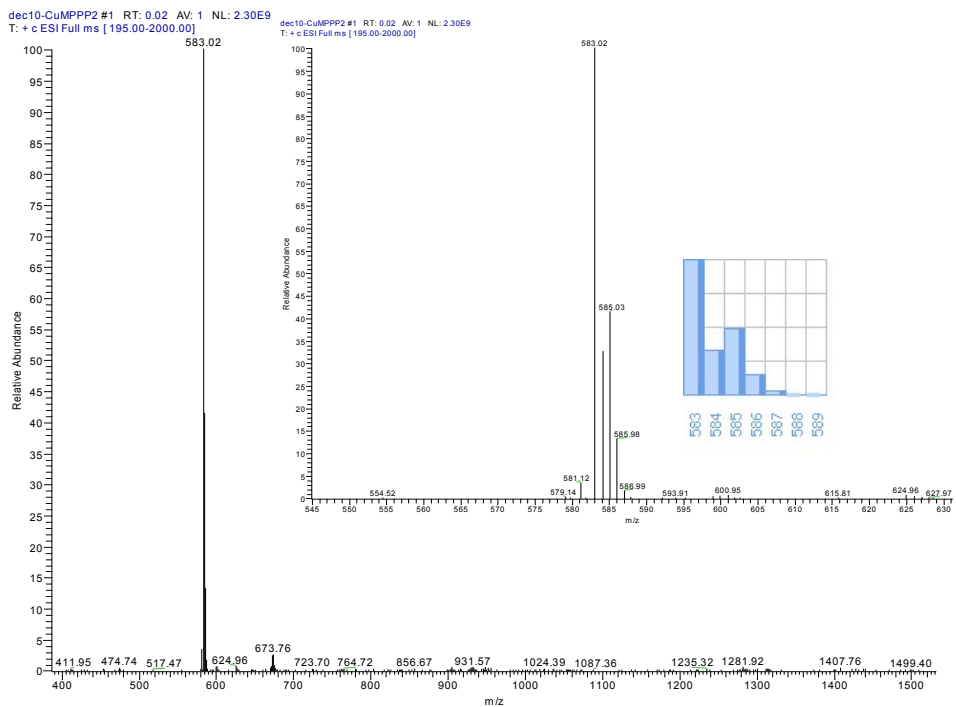

**Figure S34.** ESI-MS of Cu(MPPP)<sub>2</sub>OTf (10).

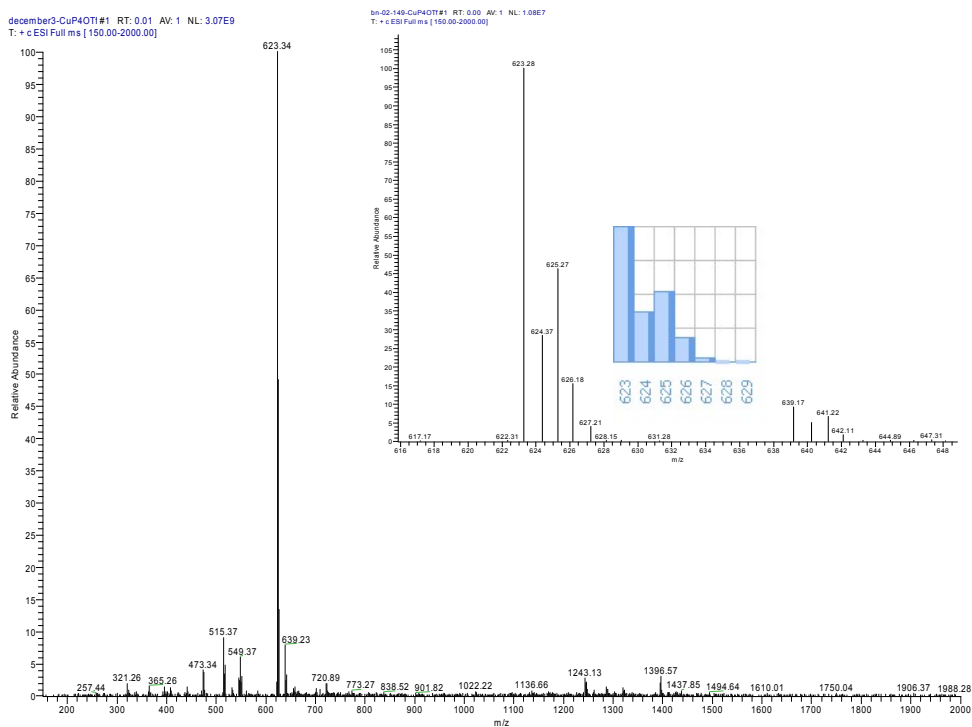

**Figure S35.** ESI-MS of Cu(4)OTf (11).

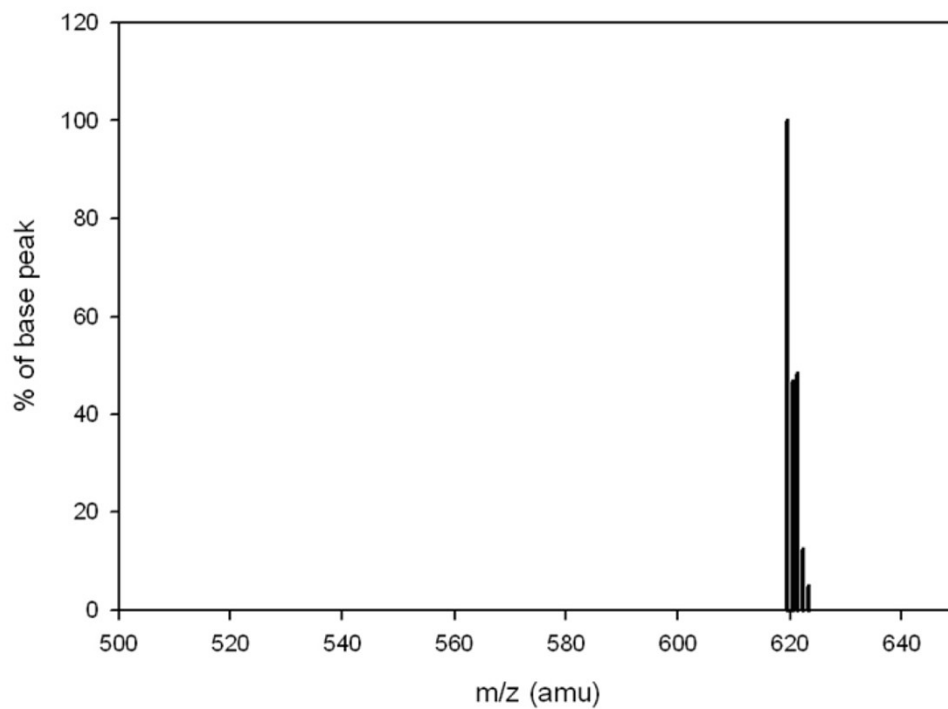

**Figure S36.** ESI mass spectrum of **12**.

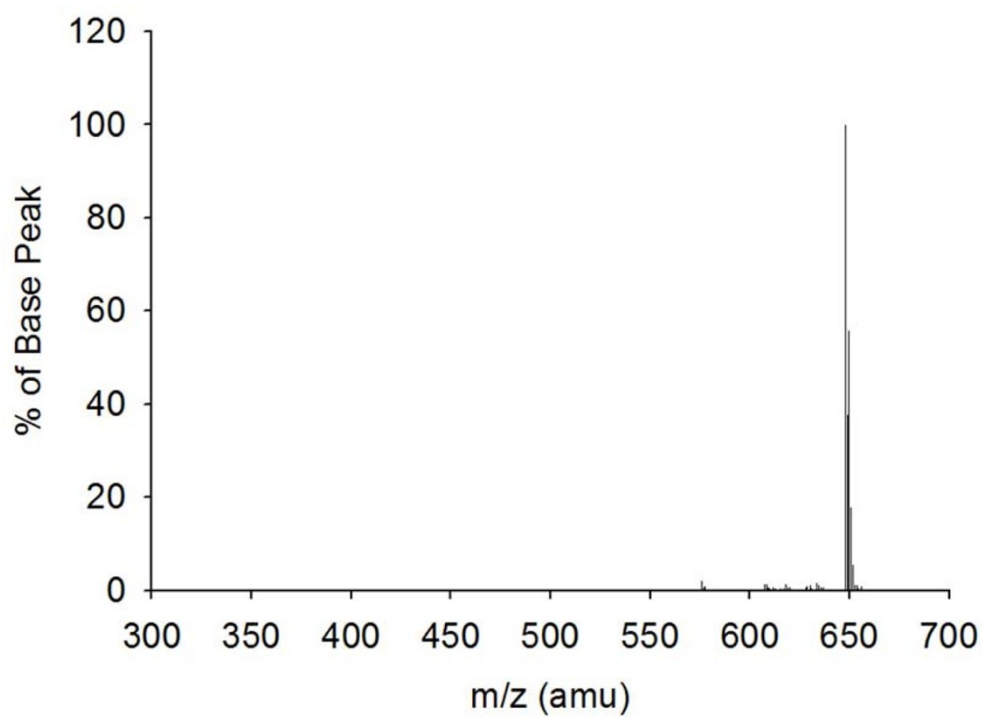

**Figure S37.** ESI mass spectrum of **13**.

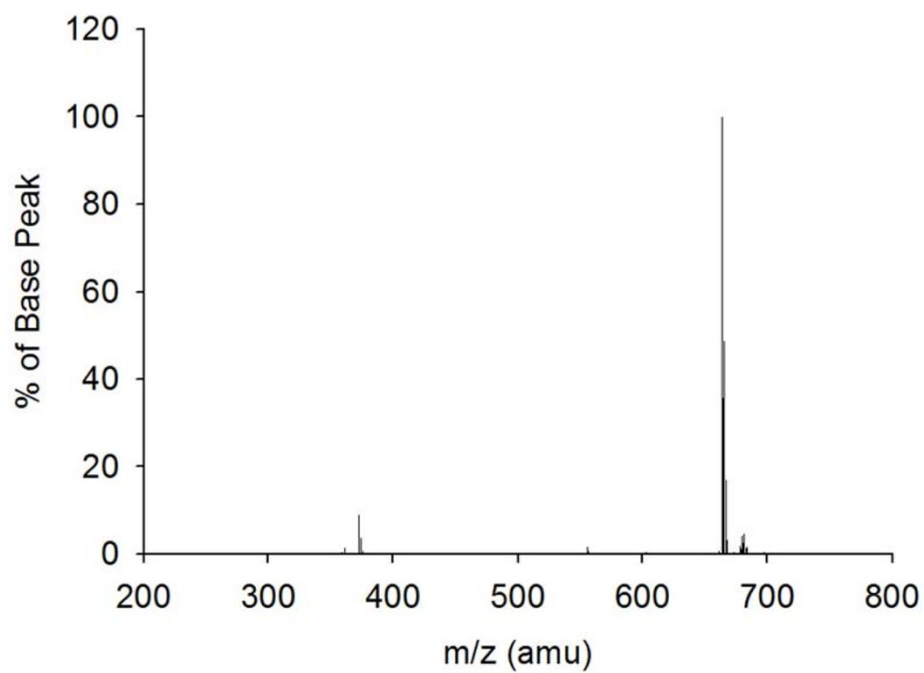

Figure S38. ESI mass spectrum of 15.

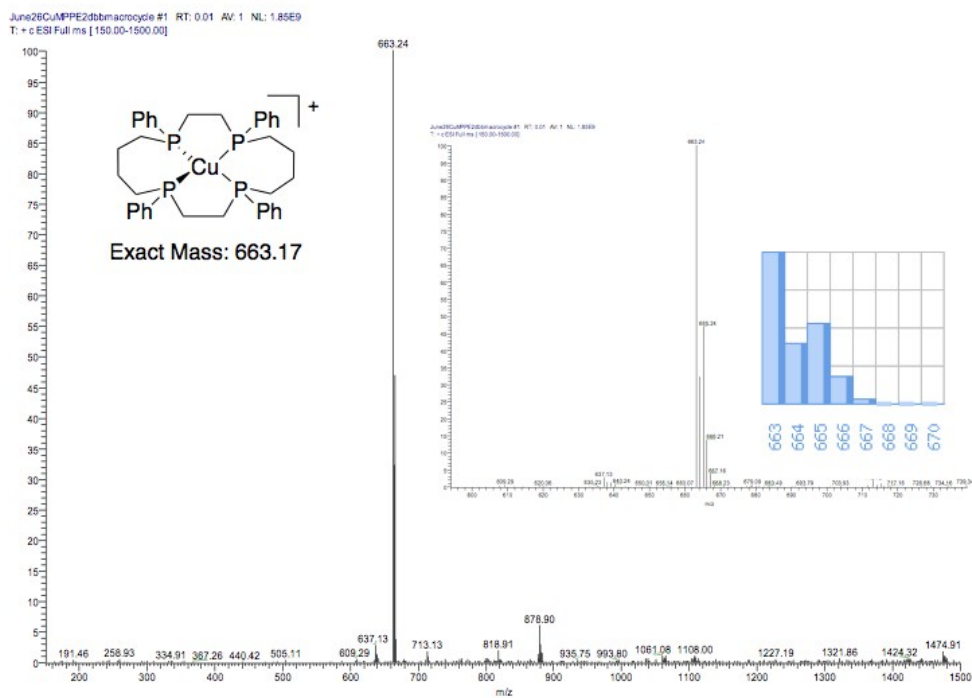

Figure S39. ESI mass spectrum of 16.

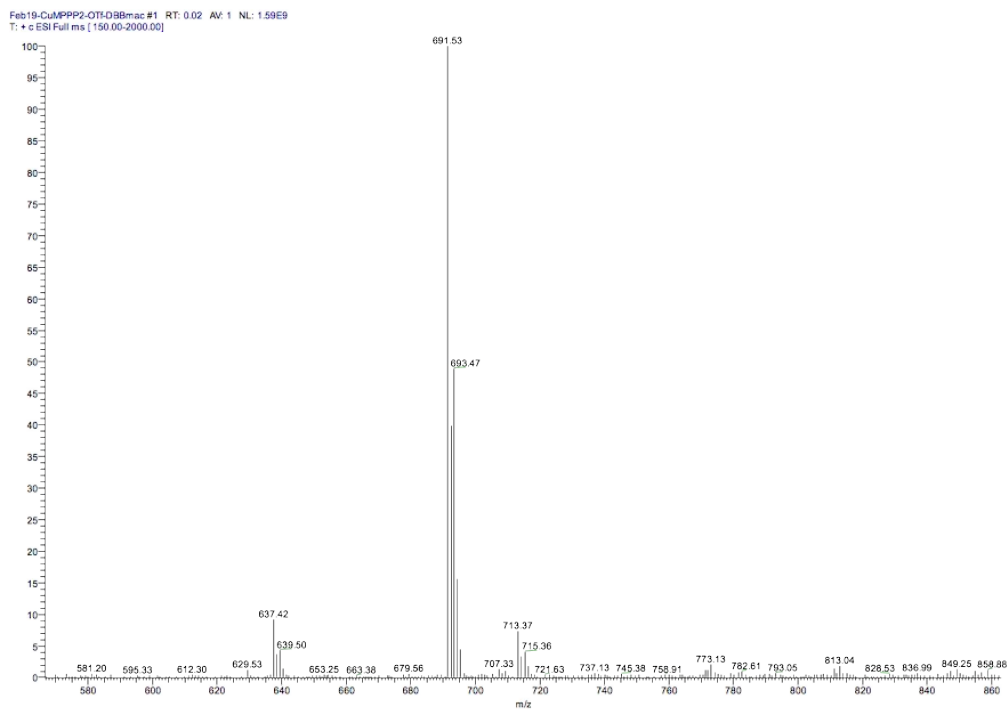

**Figure S40.** ESI mass spectrum of **17**.

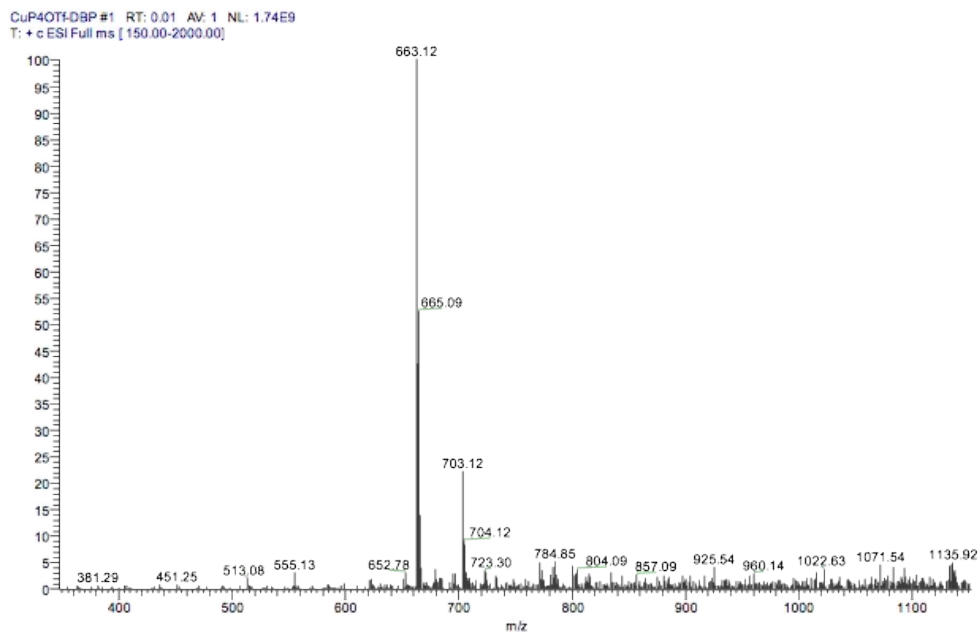

**Figure S41.** ESI mass spectrum of **15**.

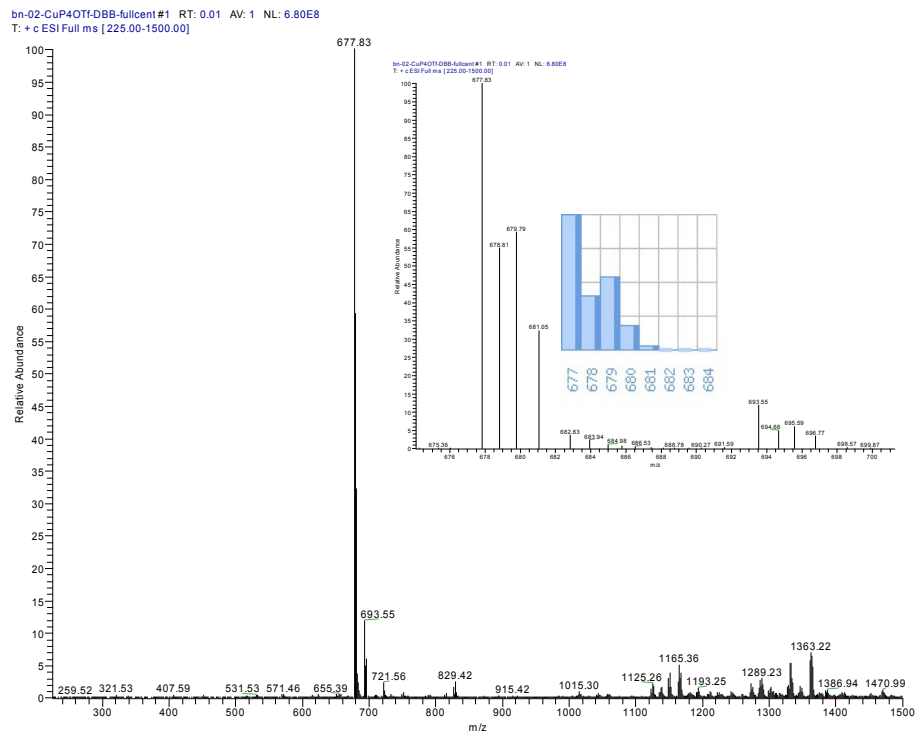

Figure S42. ESI-MS of 18.

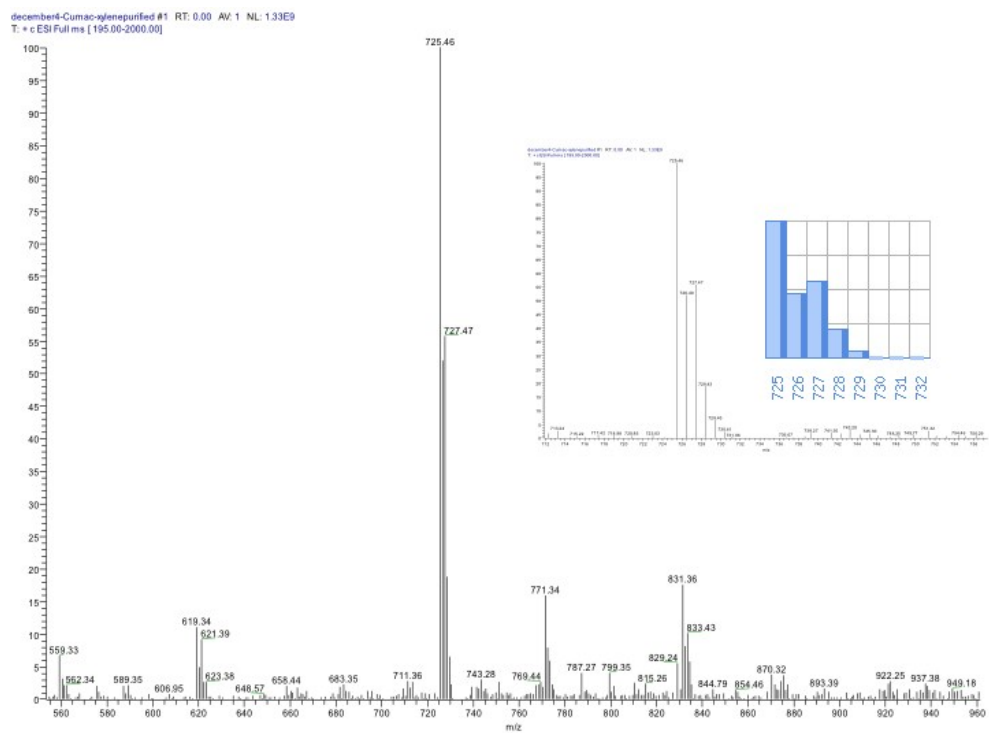

Figure S43. ESI-MS of 19.



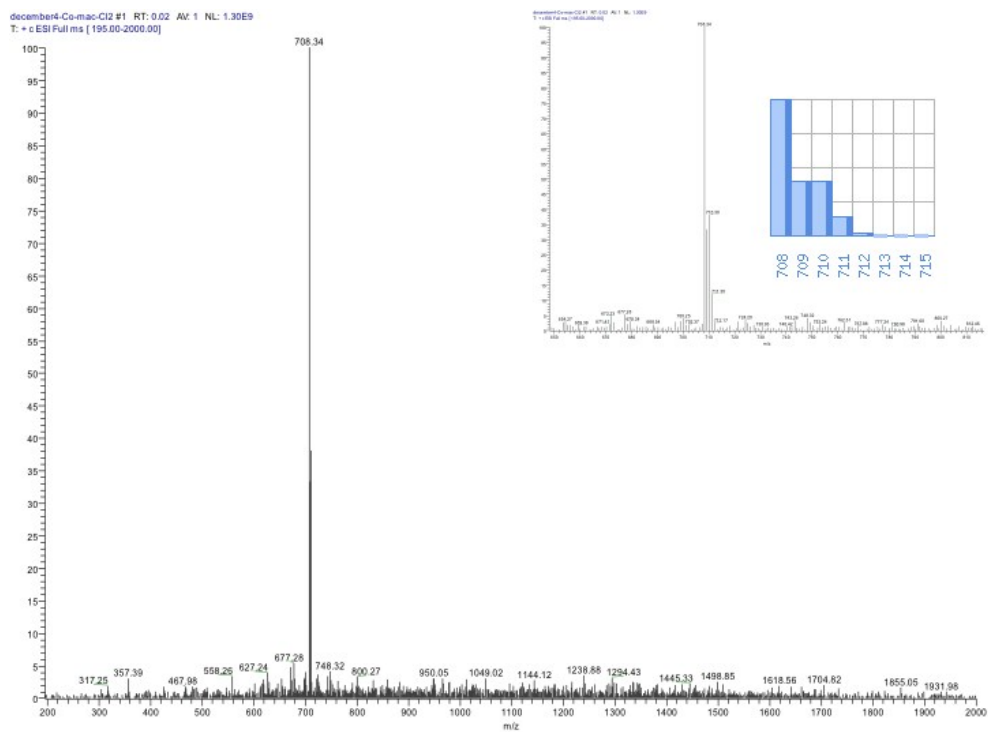

**Figure S44.** ESI-MS of  $[\text{Co}(\mathbf{21})]\text{Cl}_2$ .

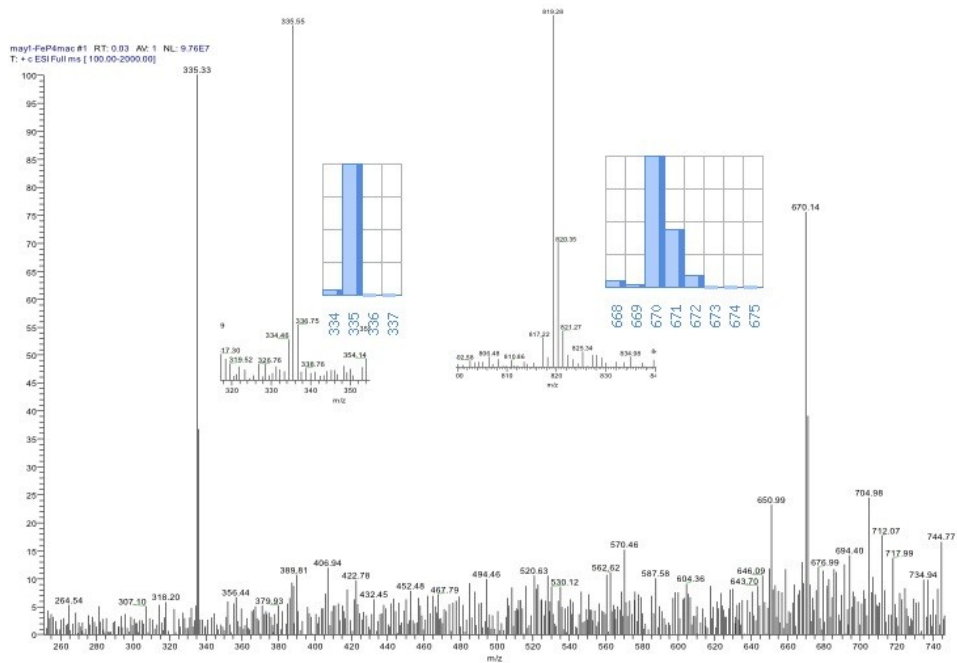

**Figure S45.** ESI-MS of  $[\text{Fe}(\mathbf{21})(\text{CH}_3\text{CN})_2](\text{BPh}_4)_2$ .

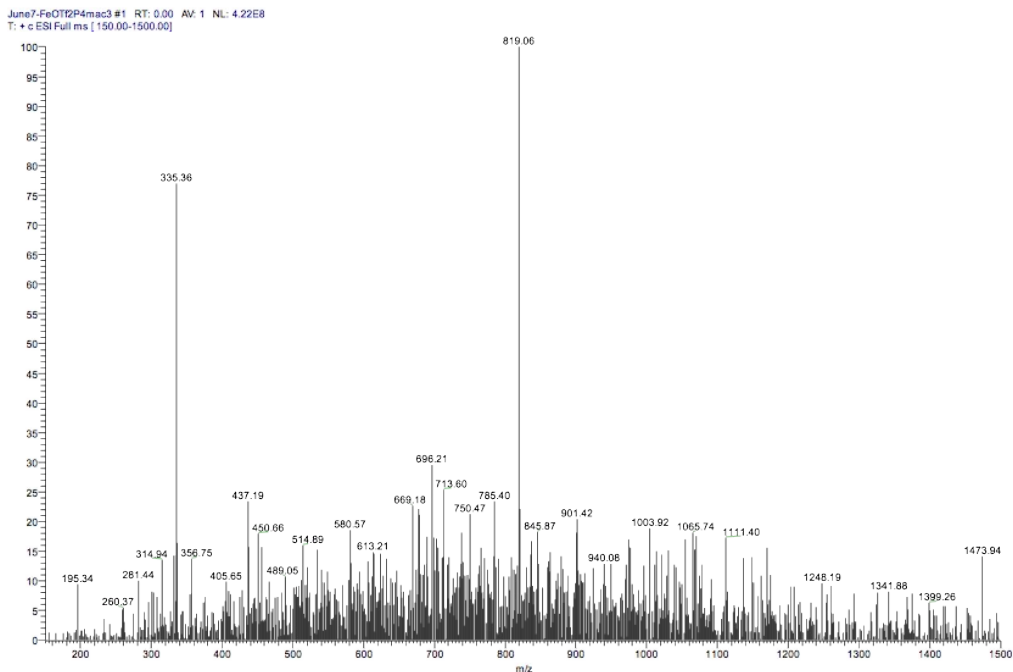

**Figure S46.** ESI mass spectrum of  $[\text{Fe}(\mathbf{21})(\text{CH}_3\text{CN})_2](\text{OTf})_2$ . The peak at  $m/z$  819 is  $\text{Fe}(\mathbf{21})\text{OTf}^+$  and the peak at 335 is  $[\text{Fe}(\mathbf{21})]^{2+}$ .

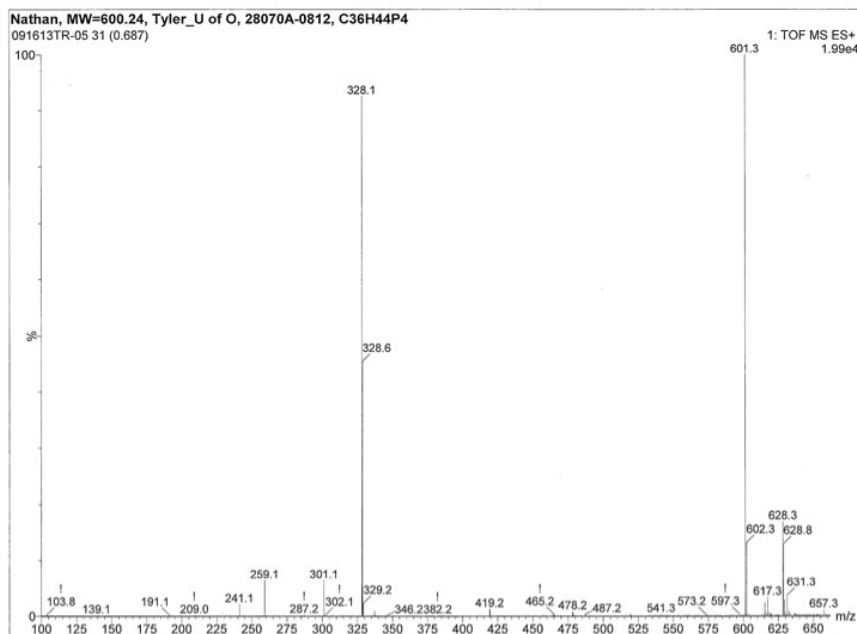

**Figure S47.** FAB mass spectrum of **23**.

Elemental Composition Report

Single Mass Analysis

Tolerance = 50.0 PPM / DBE: min = -1.5, max = 50.0

Selected filters: None

Monoisotopic Mass, Even Electron Ions

8 formula(e) evaluated with 1 results within limits (up to 50 best isotopic matches for each mass)

Elements Used:

C: 0-36 H: 0-45 Na: 0-1 P: 0-4

Nathan, MW=600.24, Tyler\_U of O, 28070A-0812, C36H44P4

091613TR-05 36 (0.793) Cm (36:48)

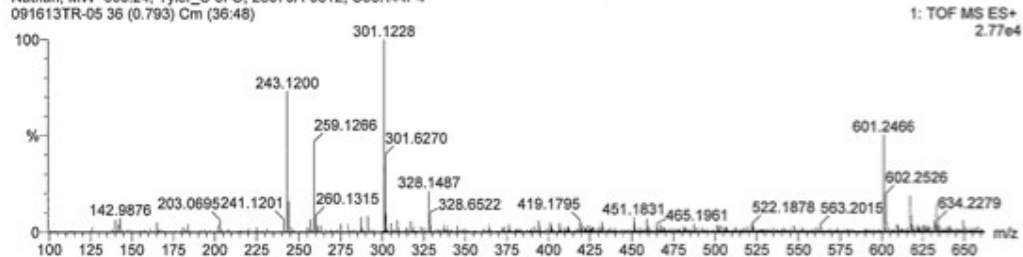

Minimum:

Maximum: 5.0 50.0 -1.5

| Mass     | Calc. Mass | mDa  | PPM  | DBE  | i-FIT | Formula    |
|----------|------------|------|------|------|-------|------------|
| 601.2466 | 601.2472   | -0.6 | -1.0 | 16.5 | 43.1  | C36 H45 P4 |

Figure S48. Hi-Res FAB-MS of 23.

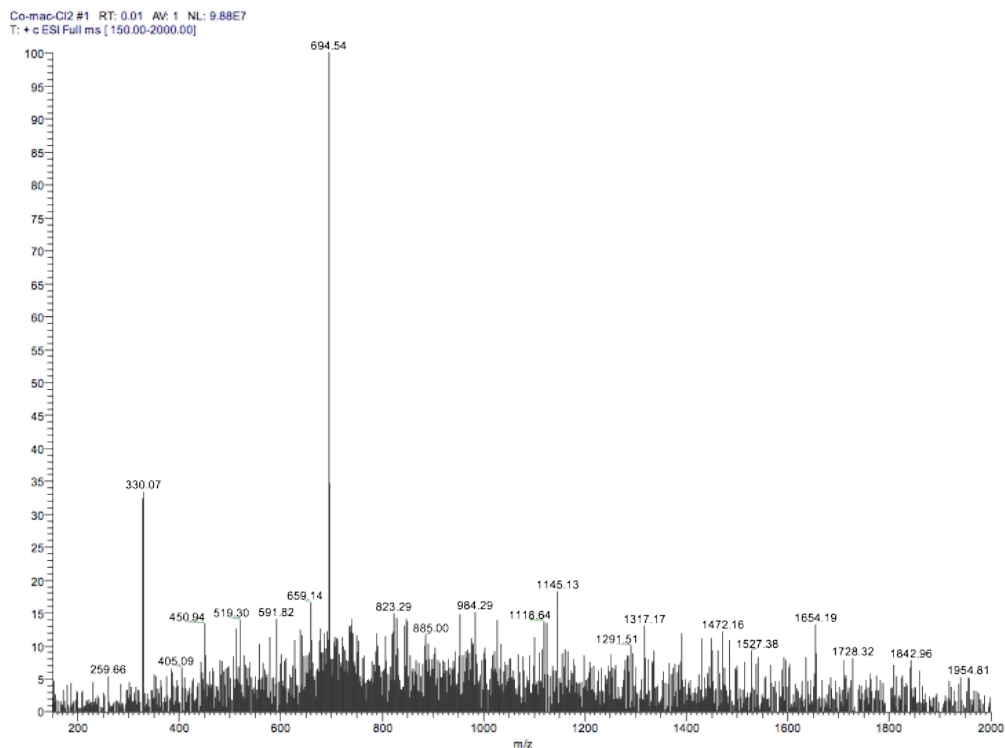

Figure S49. ESI mass spectrum of Co(23)Cl<sub>2</sub>.

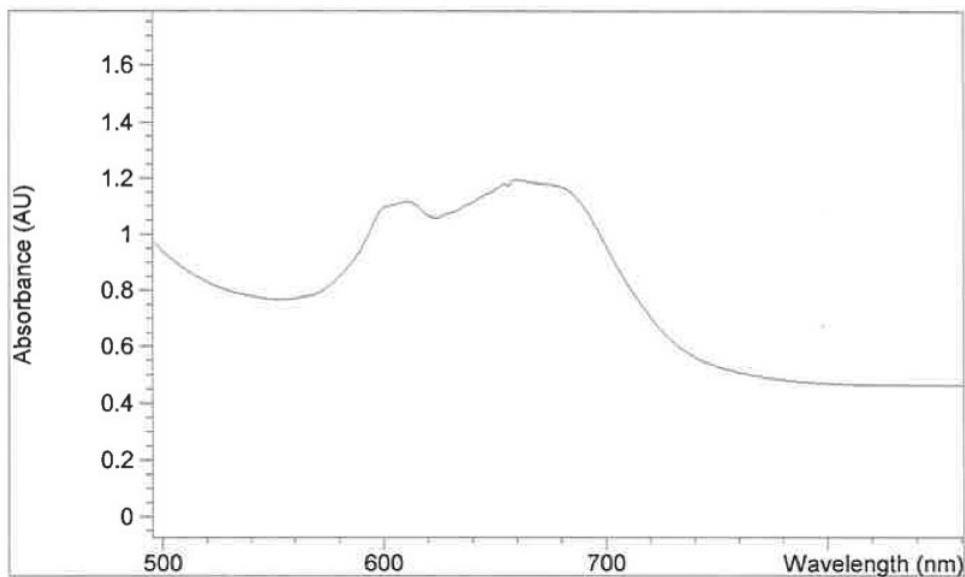

**Figure S50.** UV-Vis spectrum of Co(21)Cl<sub>2</sub> in dichloromethane.

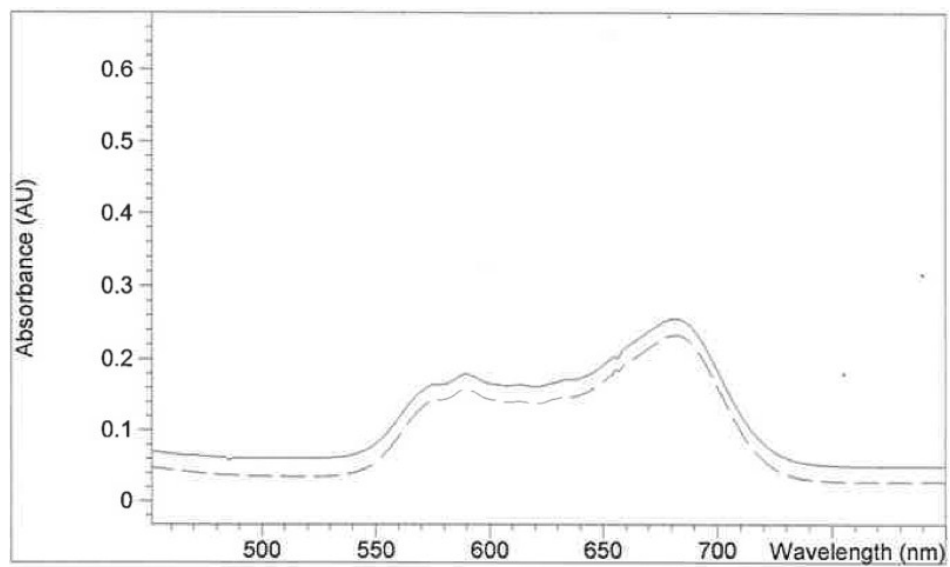

**Figure S51.** UV-Vis spectrum of Co(23)Cl<sub>2</sub> in dichloromethane.

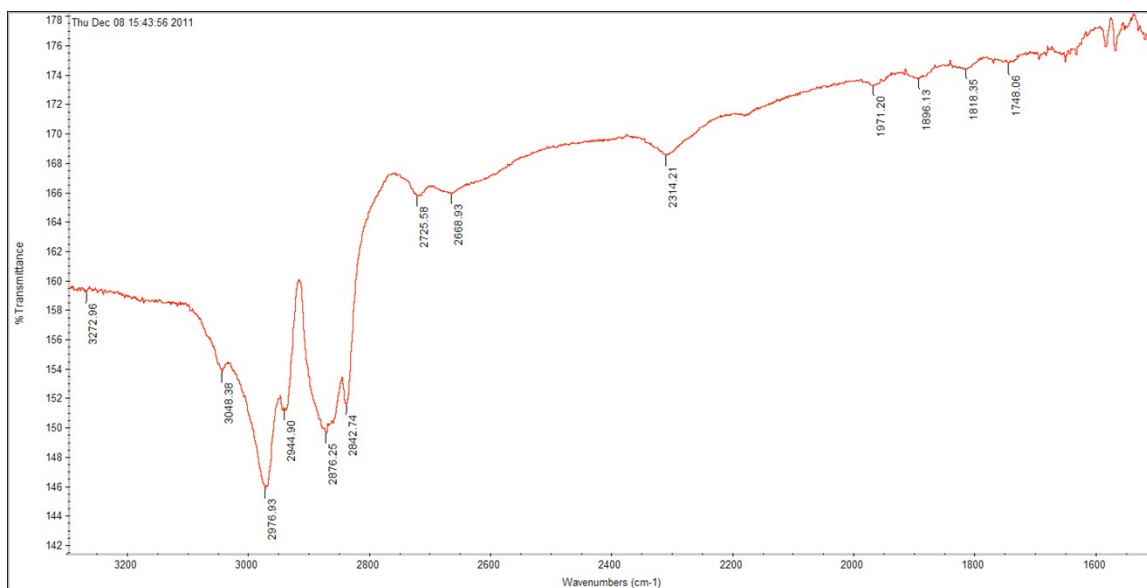

**Figure S52.** Infrared spectrum (ATR method) of Cu(4)OTf, **11**.

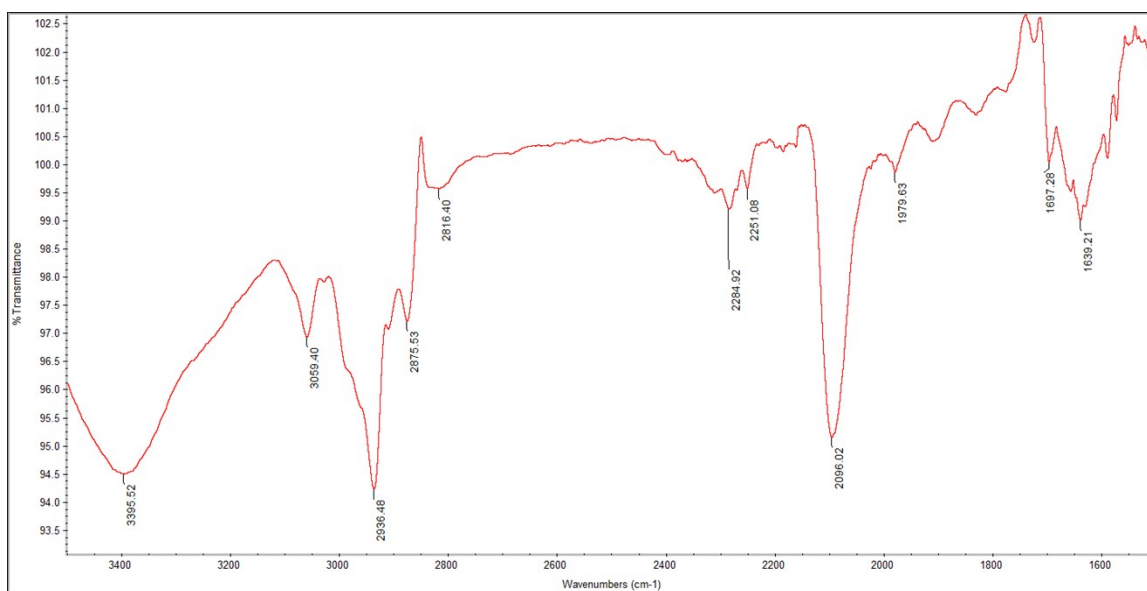

**Figure S53.** Infrared spectrum (ATR method) of [Fe(**21**)(CH<sub>3</sub>CN)<sub>2</sub>](OTf)<sub>2</sub>.

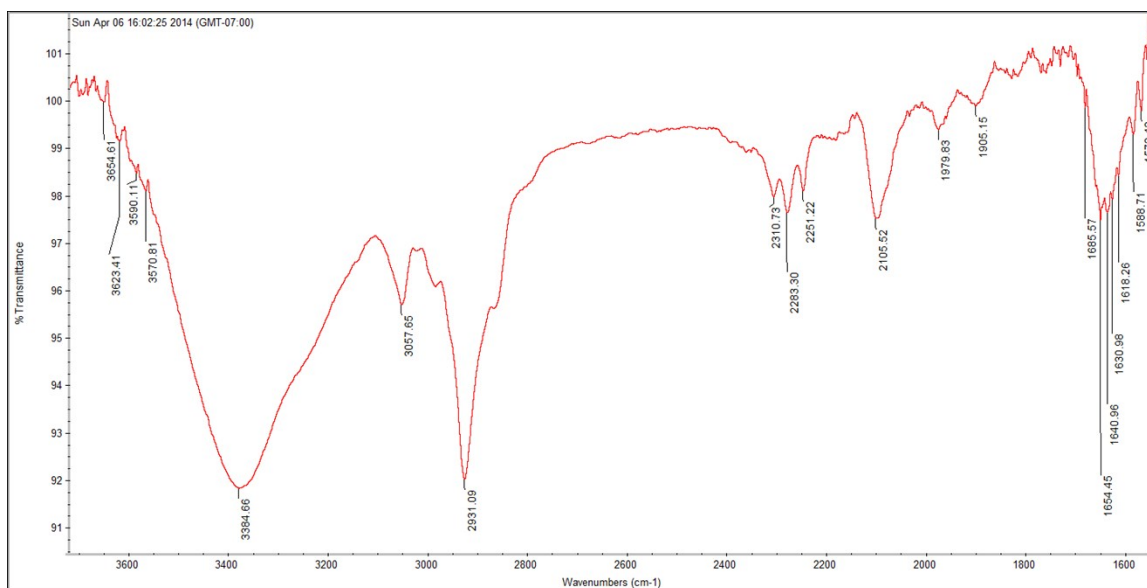

**Figure S54.** Infrared spectrum (ATR method) of  $[\text{Fe}(\mathbf{21})(\text{CH}_3\text{CN})_2](\text{OTf})_2$  prepared in an Ar-filled glovebox.

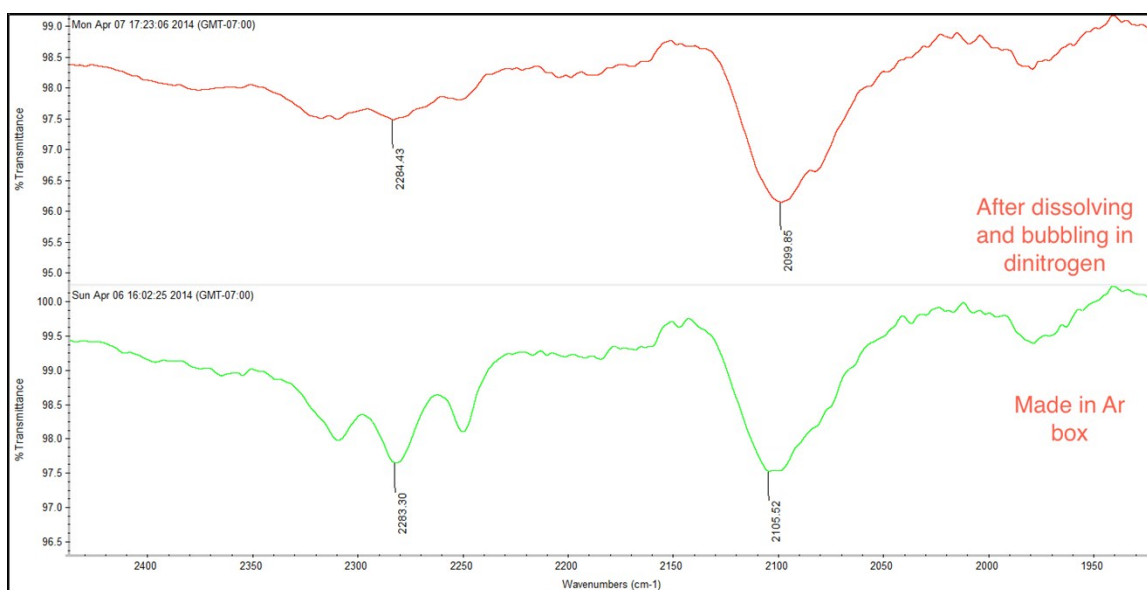

**Figure S55.** Infrared spectrum (ATR method) of  $[\text{Fe}(\mathbf{21})(\text{CH}_3\text{CN})_2](\text{OTf})_2$  prepared in an Ar-filled glovebox, redissolved and bubbled with  $\text{N}_2$ .

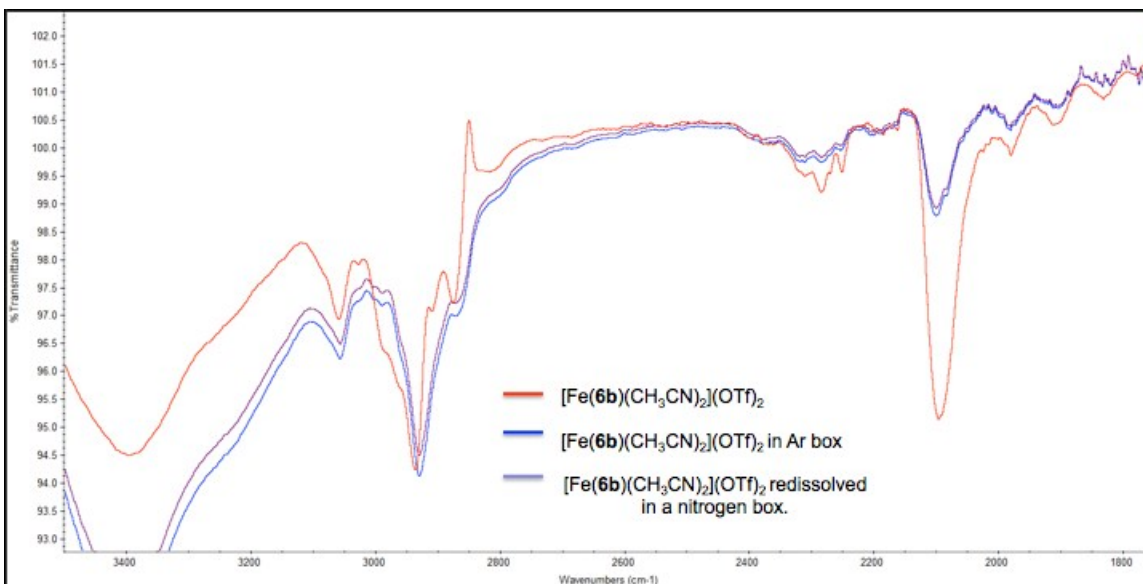

**Figure S56.** Overlay of  $[\text{Fe}(\mathbf{6b})(\text{CH}_3\text{CN})_2](\text{OTf})_2$  prepared in an argon-filled glovebox vs. the same complex prepared in a nitrogen-filled glovebox.

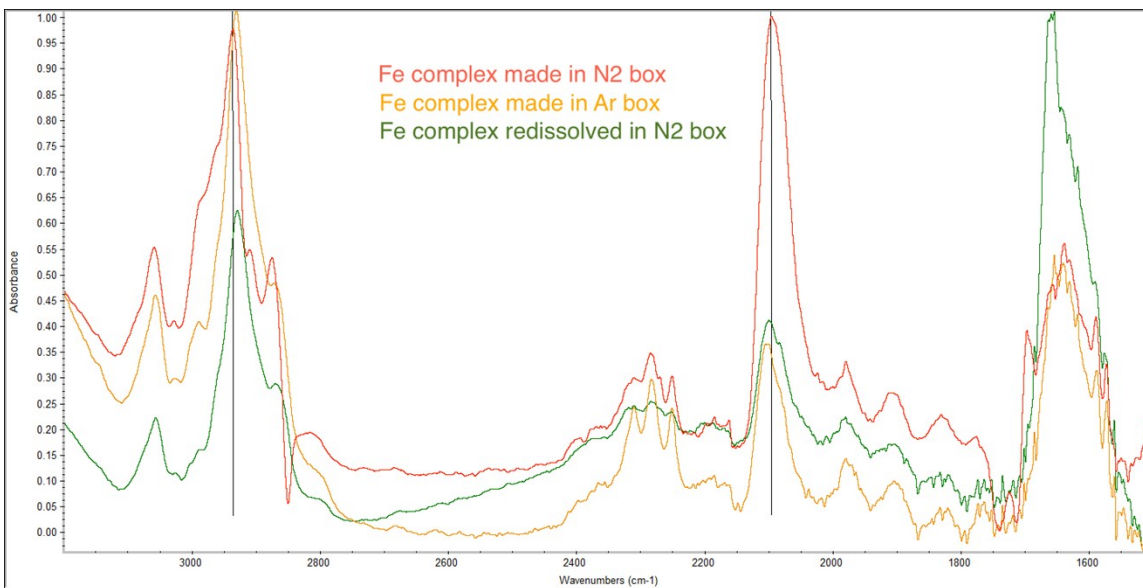

**Figure S57.** Overlay of  $[\text{Fe}(\mathbf{21})(\text{CH}_3\text{CN})_2](\text{OTf})_2$  prepared in an argon-filled glovebox vs. the same complex prepared in a nitrogen-filled glovebox (y-axis is absorbance).

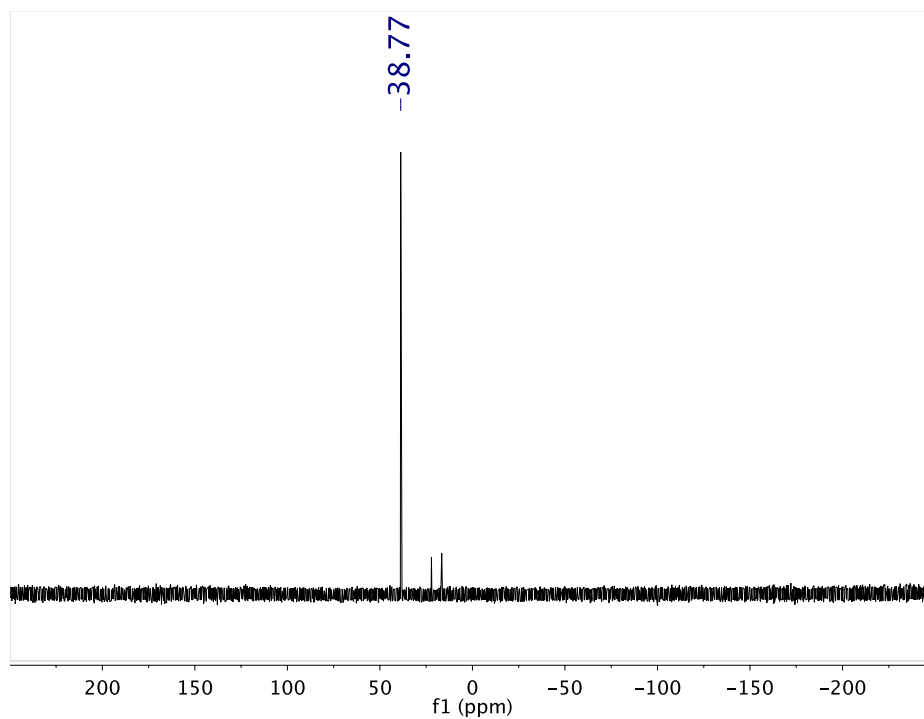

**Figure S58.**  $^{31}\text{P}\{^1\text{H}\}$  NMR spectrum of isopropyl allyl(phenyl)phosphinate in  $\text{CDCl}_3$ .

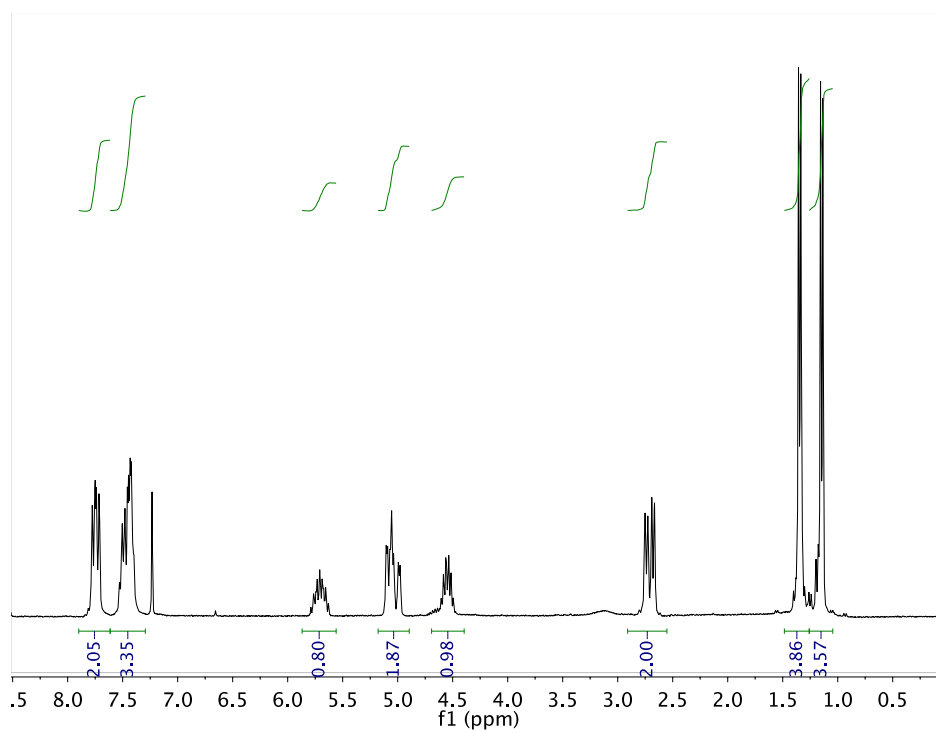

**Figure S59.**  $^1\text{H}$  NMR spectrum of isopropyl allyl(phenyl)phosphinate in  $\text{CDCl}_3$ .



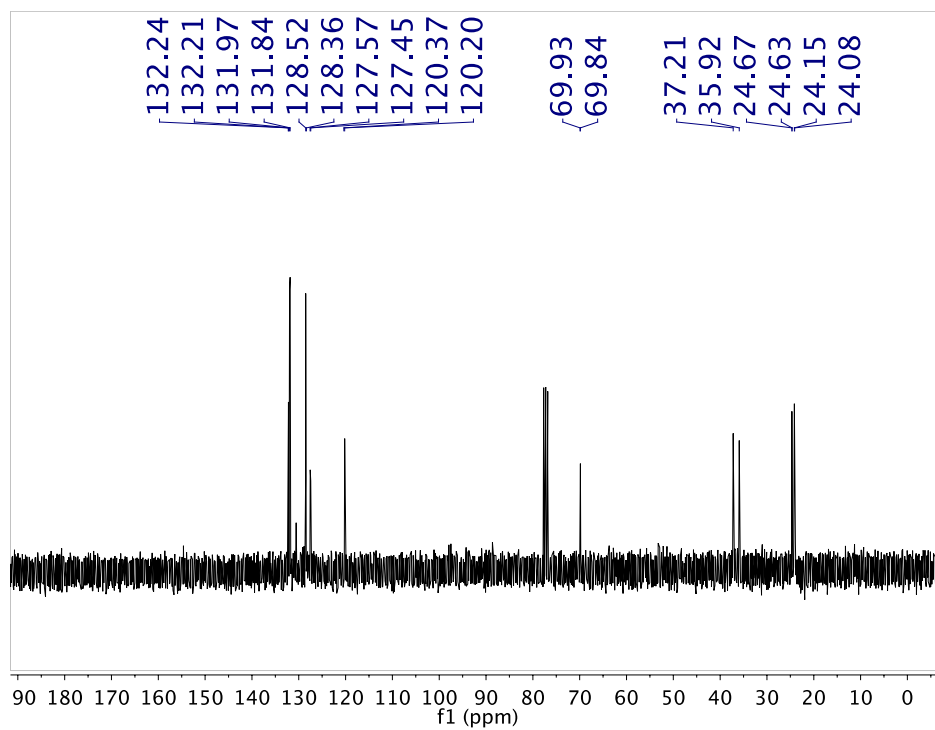

**Figure S60.**  $^{13}\text{C}$  NMR spectrum of isopropyl allyl(phenyl)phosphinate in  $\text{CDCl}_3$ .

**Table S2.** Crystal data and structure refinement for **15**.

$C_{37}H_{44}CuF_3O_3P_4S$ ,  $M = 813.20$ ,  $0.21 \times 0.12 \times 0.06$  mm,  $T = 150$  K, Tetragonal, space group  $I-4$ ,  $a = 13.207(4)$  Å,  $b = 13.207(4)$  Å,  $c = 10.681(4)$  Å,  $V = 1862.9(14)$  Å<sup>3</sup>,  $Z = 2$ ,  $D_c = 1.450$  Mg/m<sup>3</sup>,  $\mu(\text{Mo}) = 0.865$  mm<sup>-1</sup>,  $F(000) = 844$ ,  $2\theta_{\text{max}} = 50.0^\circ$ , 3231 reflections, 1536 independent reflections [ $R_{\text{int}} = 0.0696$ ],  $R1 = 0.0822$ ,  $wR2 = 0.2187$  and GOF = 1.081 for 1536 reflections (94 parameters) with  $I > 2\sigma(I)$ ,  $R1 = 0.1026$ ,  $wR2 = 0.2337$  and GOF = 1.081 for all reflections, max/min residual electron density  $+2.147/-0.489$  eÅ<sup>-3</sup>.

**Table S3.** Atomic coordinates ( $\times 10^4$ ) and equivalent isotropic displacement parameters ( $\text{\AA}^2 \times 10^3$ ) for mo\_dtr26\_0m\_a.  $U(\text{eq})$  is defined as one third of the trace of the orthogonalized  $U^{ij}$  tensor.

|       | x       | y        | z        | $U(\text{eq})$ |
|-------|---------|----------|----------|----------------|
| Cu(1) | 10000   | 10000    | 5000     | 38(1)          |
| P(1)  | 8571(2) | 9590(2)  | 4019(3)  | 38(1)          |
| C(1)  | 8399(6) | 8230(7)  | 3766(10) | 46(3)          |
| C(2)  | 8800(7) | 7563(6)  | 4842(13) | 52(3)          |
| C(3)  | 9991(6) | 7516(6)  | 5004(13) | 46(2)          |
| C(4)  | 8168(6) | 10086(6) | 2495(12) | 48(3)          |
| C(5)  | 7234(7) | 9832(6)  | 2005(11) | 46(3)          |
| C(6)  | 6950(9) | 10216(8) | 874(14)  | 66(3)          |
| C(7)  | 7570(8) | 10877(8) | 227(13)  | 58(3)          |
| C(8)  | 8476(9) | 11157(9) | 698(12)  | 62(3)          |
| C(9)  | 8794(7) | 10772(6) | 1874(11) | 48(3)          |
| O(1S) | 10000   | 10000    | 690(30)  | 500(90)        |

**Table S4.** Bond lengths [Å] and angles [°] for mo\_dtr26\_0m\_a.

---

|                     |            |
|---------------------|------------|
| Cu(1)-P(1)          | 2.225(2)   |
| Cu(1)-P(1)#1        | 2.225(2)   |
| Cu(1)-P(1)#2        | 2.225(2)   |
| Cu(1)-P(1)#3        | 2.225(2)   |
| P(1)-C(3)#2         | 1.827(10)  |
| P(1)-C(1)           | 1.831(9)   |
| P(1)-C(4)           | 1.834(12)  |
| C(1)-C(2)           | 1.542(15)  |
| C(1)-H(1A)          | 0.9900     |
| C(1)-H(1B)          | 0.9900     |
| C(2)-C(3)           | 1.584(13)  |
| C(2)-H(2A)          | 0.9900     |
| C(2)-H(2B)          | 0.9900     |
| C(3)-P(1)#3         | 1.827(10)  |
| C(3)-H(3A)          | 0.9900     |
| C(3)-H(3B)          | 0.9900     |
| C(4)-C(9)           | 1.394(13)  |
| C(4)-C(5)           | 1.382(13)  |
| C(5)-C(6)           | 1.363(16)  |
| C(5)-H(5A)          | 0.9500     |
| C(6)-C(7)           | 1.382(17)  |
| C(6)-H(6A)          | 0.9500     |
| C(7)-C(8)           | 1.349(17)  |
| C(7)-H(7A)          | 0.9500     |
| C(8)-C(9)           | 1.418(18)  |
| C(8)-H(8A)          | 0.9500     |
| C(9)-H(9A)          | 0.9500     |
| O(1S)-O(1S)#4       | 1.48(7)    |
|                     |            |
| P(1)-Cu(1)-P(1)#1   | 123.82(14) |
| P(1)-Cu(1)-P(1)#2   | 102.81(6)  |
| P(1)#1-Cu(1)-P(1)#2 | 102.81(6)  |
| P(1)-Cu(1)-P(1)#3   | 102.81(6)  |
| P(1)#1-Cu(1)-P(1)#3 | 102.81(6)  |

|                     |            |
|---------------------|------------|
| P(1)#2-Cu(1)-P(1)#3 | 123.82(14) |
| C(3)#2-P(1)-C(1)    | 106.7(4)   |
| C(3)#2-P(1)-C(4)    | 100.2(5)   |
| C(1)-P(1)-C(4)      | 100.6(5)   |
| C(3)#2-P(1)-Cu(1)   | 107.7(4)   |
| C(1)-P(1)-Cu(1)     | 114.4(3)   |
| C(4)-P(1)-Cu(1)     | 125.3(3)   |
| C(2)-C(1)-P(1)      | 114.1(7)   |
| C(2)-C(1)-H(1A)     | 108.7      |
| P(1)-C(1)-H(1A)     | 108.8      |
| C(2)-C(1)-H(1B)     | 108.7      |
| P(1)-C(1)-H(1B)     | 108.7      |
| H(1A)-C(1)-H(1B)    | 107.6      |
| C(1)-C(2)-C(3)      | 116.4(9)   |
| C(1)-C(2)-H(2A)     | 108.2      |
| C(3)-C(2)-H(2A)     | 108.2      |
| C(1)-C(2)-H(2B)     | 108.1      |
| C(3)-C(2)-H(2B)     | 108.3      |
| H(2A)-C(2)-H(2B)    | 107.3      |
| C(2)-C(3)-P(1)#3    | 109.5(6)   |
| C(2)-C(3)-H(3A)     | 109.9      |
| P(1)#3-C(3)-H(3A)   | 109.8      |
| C(2)-C(3)-H(3B)     | 109.8      |
| P(1)#3-C(3)-H(3B)   | 109.7      |
| H(3A)-C(3)-H(3B)    | 108.2      |
| C(9)-C(4)-C(5)      | 120.5(11)  |
| C(9)-C(4)-P(1)      | 118.8(8)   |
| C(5)-C(4)-P(1)      | 120.6(8)   |
| C(6)-C(5)-C(4)      | 119.4(10)  |
| C(6)-C(5)-H(5A)     | 120.3      |
| C(4)-C(5)-H(5A)     | 120.4      |
| C(5)-C(6)-C(7)      | 121.1(11)  |
| C(5)-C(6)-H(6A)     | 119.5      |
| C(7)-C(6)-H(6A)     | 119.4      |
| C(8)-C(7)-C(6)      | 120.8(12)  |
| C(8)-C(7)-H(7A)     | 119.6      |

|                 |           |
|-----------------|-----------|
| C(6)-C(7)-H(7A) | 119.6     |
| C(7)-C(8)-C(9)  | 119.7(11) |
| C(7)-C(8)-H(8A) | 120.2     |
| C(9)-C(8)-H(8A) | 120.1     |
| C(4)-C(9)-C(8)  | 118.6(10) |
| C(4)-C(9)-H(9A) | 120.7     |
| C(8)-C(9)-H(9A) | 120.7     |

---

Symmetry transformations used to generate equivalent atoms:

#1  $-x+2, -y+2, z$  #2  $y, -x+2, -z+1$  #3  $-y+2, x, -z+1$

#4  $y, -x+2, -z$

**Table S5.** Anisotropic displacement parameters ( $\text{\AA}^2 \times 10^3$ ) for mo\_dtr26\_0m\_a. The anisotropic displacement factor exponent takes the form:  $-2\pi^2 [ h^2 a^* U^{11} + \dots + 2 h k a^* b^* U^{12} ]$

|       | U <sup>11</sup> | U <sup>22</sup> | U <sup>33</sup> | U <sup>23</sup> | U <sup>13</sup> | U <sup>12</sup> |
|-------|-----------------|-----------------|-----------------|-----------------|-----------------|-----------------|
| Cu(1) | 25(1)           | 25(1)           | 63(2)           | 0               | 0               | 0               |
| P(1)  | 28(1)           | 29(1)           | 58(2)           | 2(1)            | 0(1)            | -5(1)           |
| C(1)  | 29(4)           | 37(5)           | 71(8)           | -3(4)           | 2(5)            | 0(3)            |
| C(2)  | 47(5)           | 38(4)           | 72(8)           | 3(5)            | -1(6)           | -6(3)           |
| C(3)  | 44(4)           | 31(4)           | 64(6)           | 0(6)            | 6(6)            | 9(3)            |
| C(4)  | 26(4)           | 32(5)           | 84(8)           | -8(5)           | 2(5)            | 3(3)            |
| C(5)  | 40(5)           | 25(4)           | 73(8)           | 7(4)            | 0(5)            | -2(3)           |
| C(6)  | 66(7)           | 43(6)           | 88(9)           | -9(6)           | -9(7)           | -6(5)           |
| C(7)  | 57(6)           | 58(6)           | 60(8)           | 8(6)            | 3(6)            | 15(4)           |
| C(8)  | 71(8)           | 53(6)           | 61(8)           | -2(6)           | 9(6)            | 12(6)           |
| C(9)  | 40(5)           | 27(4)           | 75(8)           | 2(5)            | 6(5)            | -3(3)           |
| O(1S) | 900(200)        | 550(110)        | 25(19)          | 0               | 0               | -400(140)       |

**Table S6.** Hydrogen coordinates ( $\times 10^4$ ) and isotropic displacement parameters ( $\text{\AA}^2 \times 10^3$ ) for mo\_dtr26\_0m\_a.

|       | x     | y     | z    | U(eq) |
|-------|-------|-------|------|-------|
| H(1A) | 7668  | 8092  | 3651 | 55    |
| H(1B) | 8749  | 8036  | 2983 | 55    |
| H(2A) | 8548  | 6864  | 4711 | 63    |
| H(2B) | 8503  | 7812  | 5636 | 63    |
| H(3A) | 10321 | 7555  | 4174 | 56    |
| H(3B) | 10185 | 6867  | 5400 | 56    |
| H(5A) | 6793  | 9392  | 2452 | 55    |
| H(6A) | 6316  | 10027 | 525  | 79    |
| H(7A) | 7356  | 11138 | -558 | 70    |
| H(8A) | 8898  | 11609 | 244  | 74    |
| H(9A) | 9420  | 10977 | 2230 | 57    |



**Table S7.** Torsion angles [°] for mo\_dtr26\_0m\_a.

---

|                          |           |
|--------------------------|-----------|
| P(1)#1-Cu(1)-P(1)-C(3)#2 | -148.2(3) |
| P(1)#2-Cu(1)-P(1)-C(3)#2 | -33.0(3)  |
| P(1)#3-Cu(1)-P(1)-C(3)#2 | 96.6(3)   |
| P(1)#1-Cu(1)-P(1)-C(1)   | 93.4(4)   |
| P(1)#2-Cu(1)-P(1)-C(1)   | -151.4(4) |
| P(1)#3-Cu(1)-P(1)-C(1)   | -21.9(4)  |
| P(1)#1-Cu(1)-P(1)-C(4)   | -31.2(4)  |
| P(1)#2-Cu(1)-P(1)-C(4)   | 84.0(4)   |
| P(1)#3-Cu(1)-P(1)-C(4)   | -146.5(4) |
| C(3)#2-P(1)-C(1)-C(2)    | -82.9(8)  |
| C(4)-P(1)-C(1)-C(2)      | 173.0(7)  |
| Cu(1)-P(1)-C(1)-C(2)     | 36.1(8)   |
| P(1)-C(1)-C(2)-C(3)      | -69.8(11) |
| C(1)-C(2)-C(3)-P(1)#3    | 86.3(11)  |
| C(3)#2-P(1)-C(4)-C(9)    | 120.9(8)  |
| C(1)-P(1)-C(4)-C(9)      | -129.9(8) |
| Cu(1)-P(1)-C(4)-C(9)     | 0.4(9)    |
| C(3)#2-P(1)-C(4)-C(5)    | -55.4(8)  |
| C(1)-P(1)-C(4)-C(5)      | 53.9(8)   |
| Cu(1)-P(1)-C(4)-C(5)     | -175.8(6) |
| C(9)-C(4)-C(5)-C(6)      | 3.4(14)   |
| P(1)-C(4)-C(5)-C(6)      | 179.6(8)  |
| C(4)-C(5)-C(6)-C(7)      | -1.7(15)  |
| C(5)-C(6)-C(7)-C(8)      | 0.2(17)   |
| C(6)-C(7)-C(8)-C(9)      | -0.3(17)  |
| C(5)-C(4)-C(9)-C(8)      | -3.4(14)  |
| P(1)-C(4)-C(9)-C(8)      | -179.7(7) |
| C(7)-C(8)-C(9)-C(4)      | 1.9(15)   |

---

Symmetry transformations used to generate equivalent atoms:

#1 -x+2,-y+2,z #2 y,-x+2,-z+1 #3 -y+2,x,-z+1

#4 y,-x+2,-z
